# Supplementary material for: 5-N-Arylaminothiazoles with pyridyl groups and their first-row transition metal complexes: synthesis, photophysical properties, and Zn sensing
Source: Royal Society of Chemistry journal article supplement (doi:10.1039/d2ra01694j), 2022-01-01

## Supporting Information

### **5-*N*-Arylaminothiazoles with pyridyl groups and their first-row transition metal complexes: synthesis, photophysical properties, and Zn sensing**

Khurnia Krisna Puji Pamungkas, Toshifumi Maruyama and Toshiaki Murai\*

Department of Chemistry and Biomolecular Science, Faculty of Engineering, Gifu University, Yanagido, Gifu 501-1193, Japan.

Email: [mtoshi@gifu-u.ac.jp](mailto:mtoshi@gifu-u.ac.jp)

## Contents

|                                                                                                                 |    |
|-----------------------------------------------------------------------------------------------------------------|----|
| <b>General Procedure for the Preparation of Thiazolines.</b>                                                    | 3  |
| <b>Photophysical properties of 5-<i>N</i>-arylaminothiazoles</b>                                                | 4  |
| <b>Fig. S1</b> Absorption (left) and emission properties of <b>4a</b> .                                         | 4  |
| <b>Table S1</b> Spectroscopic data of <b>4a</b> .                                                               | 4  |
| <b>Fig. S2</b> Absorption (left) and emission (right) spectra of <b>4b</b> .                                    | 5  |
| <b>Table S2</b> Spectroscopic data of <b>4b</b> .                                                               | 5  |
| <b>Fig. S3</b> Absorption (left) and emission (right) spectra of <b>4c</b> .                                    | 6  |
| <b>Table S3</b> Spectroscopic data of <b>4c</b> .                                                               | 6  |
| <b>Fig. S4</b> Absorption (left) and emission (right) spectra of <b>4d</b> .                                    | 7  |
| <b>Table S4</b> Spectroscopic data of <b>4d</b> .                                                               | 7  |
| <b>Fig. S5</b> Absorption (left) and emission (right) spectra of <b>4e</b> .                                    | 8  |
| <b>Table S5</b> Spectroscopic data of <b>4e</b> .                                                               | 8  |
| <b>Fig. S6</b> Absorption (left) and emission (right) spectra of <b>4f</b> .                                    | 9  |
| <b>Table S6</b> Spectroscopic data of <b>4f</b> .                                                               | 9  |
| <b>Spectroscopic data of zinc-thiazole 6a in different solvent polarities</b>                                   | 10 |
| <b>Table S7</b> Spectroscopic data of zinc complex <b>8a</b> in different solvent polarities.                   | 10 |
| <b>X-ray crystallography data of thiazole and nickel-thiazole complex.</b>                                      | 11 |
| <b>Table S8.</b> X-ray crystallography data of thiazole <b>4c</b> .                                             | 11 |
| <b>Table S9</b> X-ray crystallography data of nickel-thiazole complex <b>7c</b> .                               | 12 |
| <b><sup>1</sup>H NMR charts for 5-aminothiazoles, dipyrromethene type ligands, and zinc-thiazole complexes.</b> | 16 |
| <b><sup>13</sup>C NMR charts for 5-aminothiazoles and zinc-thiazole complexes.</b>                              | 27 |

## General Procedure for the Preparation of Thiazolines.

To a solution of thioamides (1 equiv) in THF was added slowly a 1.25 M solution of *n*-butyllithium in *n*-hexane (2 equiv) at 0 °C, and the mixture was stirred for 10 minutes in this temperature. To this was added thioformamides (1 equiv) at 0 °C, and the mixture was stirred for 10 minutes at this temperature. To this was added iodine (2-3 equiv) at 0 °C, and the mixture was stirred for 2 h at 0 °C. The resulting mixture was poured into a saturated aqueous solution of Na<sub>2</sub>S<sub>2</sub>O<sub>3</sub> and extracted with Et<sub>2</sub>O. The organic layer was dried over MgSO<sub>4</sub> and concentrated in vacuo. The residue was purified by column chromatography (SiO<sub>2</sub>) to give the corresponding thiazolines.

### **N,N-dimethyl-2,4-di(pyridin-2-yl)thiazol-5-amine (3a)**

Directly converted to thiazole **4a**.

### **2,4-Di(pyridin-2-yl)-N,N-di-p-tolyl-4,5-dihydrothiazol-5-amine (3b)**

**8b** (0.304 g, 46%) as a ochre yellow solid (mp: 70-72 °C); IR (KBr) 3049, 1585, 1567, 1505, 1464, 1434, 1422, 1294, 1002, 810, 781, 736 cm<sup>-1</sup>; <sup>1</sup>H NMR (400 MHz, CDCl<sub>3</sub>) δ 2.27 (s, 6H, Me) 6.12 (d, *J* = 4.3 Hz, 1H) 6.74 (d, *J* = 4.8 Hz, 1H) 6.97-6.99 (m, 4H) 7.04-7.05 (m, 4H) 7.21 (d, *J* = 7.7 Hz, 1H) 7.23-7.24 (m, 1H), 7.35-7.38 (m, 1H) 7.60-7.63 (m, 1H), 7.73 (t, 1H), 7.95 (d, *J* = 7.7 Hz, 1H), 8.64-8.68 (dd, 2H); <sup>13</sup>C NMR (500 MHz, CDCl<sub>3</sub>) δ 20.8, 78.7, 84.2, 121.5, 122.5, 123.6, 125.5, 129.4, 129.8, 133.0, 136.5, 136.7, 143.8, 149.3, 149.8, 151.6, 159.1, 171.8; MS (EI) *m/z* 436 (M<sup>+</sup>); HRMS (EI) calcd for C<sub>27</sub>H<sub>24</sub>N<sub>4</sub>S, 436.1722; found, 436.1690.

### **2-(5-Methylpyridin-2-yl)-4-(pyridin-2-yl)-N,N-di-p-tolyl-4,5-dihydrothiazol-5-amine (3c)**

**3c** (0.154 g, 95%) as a ochre yellow solid (mp: 51-52 °C); IR (KBr) 3419 3082, 2916, 1609, 1588, 1517, 1470, 1319, 1001, 808, 504 cm<sup>-1</sup>; <sup>1</sup>H NMR (400 MHz, CDCl<sub>3</sub>) δ 2.25 (s, 6H), 2.37 (s, 3H), 6.09 (d, *J* = 4.1 Hz, 1H), 6.70 (d, *J* = 4.1 Hz, 1H), 6.91 (d, *J* = 5.5 Hz, 1H), 6.97-6.98 (m, 2H), 7.01-7.03 (m, 5H), 7.17-7.21 (m, 2H), 7.50 (d, *J* = 5.5 Hz, 1H), 7.57-7.61 (m, 1H), 7.83 (d, *J* = 7.8 Hz, 1H), 8.46-8.47 (m, 1H), 8.62 (d, *J* = 4.1 Hz, 1H); <sup>13</sup>C (400 MHz, CDCl<sub>3</sub>) δ 20.72, 117.9, 119.4, 199.9, 121.3, 122.9, 124.7, 129.8, 130.1, 134.7, 137.1, 137.3, 137.5, 141.1, 148.9, 149.2, 149.5, 149.9, 152.4; MS (EI) *m/z* 450 (M<sup>+</sup>); HRMS (EI) calcd for C<sub>28</sub>H<sub>26</sub>N<sub>4</sub>S, 450.1878; found, 450.1720.

### **2-Phenyl-4-(pyridin-2-yl)-N,N-di-p-tolyl-4,5-dihydrothiazol-5-amine (3d)**

**3d** (0.295 g, 67%) as a yellow solid (mp: 43-44 °C); IR (KBr) 3025, 2919, 1586, 1508, 1432, 1231, 1039, 949, 808, 765, 690, 570 cm<sup>-1</sup>; <sup>1</sup>H NMR (400 MHz, CDCl<sub>3</sub>) δ 2.26 (s, 6H), 6.10 (d, *J* = 3.2 Hz, 1H), 6.76 (d, *J* = 3.2 Hz, 1H), 6.95-6.98 (m, 4H), 7.03-7.05 (m, 4H), 7.17-7.22 (m, 2H), 3.75-3.79 (m, 2H), 7.43-7.46 (m, 1H), 7.57-7.62 (td, 1H), 7.78-7.81 (m, 2H), 8.62-8.63 (m, 1H); <sup>13</sup>C (400 MHz, CDCl<sub>3</sub>) δ 20.8, 79.7, 83.6, 117.9, 121.4, 122.7, 123.3, 128.4, 128.5, 129.9, 131.3, 133.2, 133.8, 136.7, 143.5, 149.6, 159.1; MS (EI) *m/z* 435(M<sup>+</sup>); HRMS (EI) calcd for C<sub>28</sub>H<sub>25</sub>N<sub>3</sub>S, 435.1769; found, 435.1770.

### **N,N,2-triphenyl-4-(pyridin-2-yl)-4,5-dihydrothiazol-5-amine (3e)**

**3e** (0.181 g, 447%) as a yellow solid (mp: 98-99 °C); IR (KBr) 3063, 2360, 2332, 1653, 1586, 1489, 1434, 1230, 1094, 1041, 956, 751, 692, 624, 591, 555, 531 cm<sup>-1</sup>; <sup>1</sup>H NMR (400 MHz, CDCl<sub>3</sub>) δ 6.16 (d, *J* = 2.9 Hz, 1H), 6.83 (d, *J* = 3.9 Hz, 1H), 7.04 (t, 2H), 7.08-7.10 (m, 4H), 7.14-7.26 (m, 6H), 7.35 (t, 2H), 7.40-7.44 (m, 1H), 7.56 (dd, 1H), 7.79 (d, *J* = 7.3 Hz, 2H), 8.63 (d, *J* = 4.9 Hz, 1H); <sup>13</sup>C (400 MHz, CDCl<sub>3</sub>) δ 79.1, 83.7, 121.1, 122.6, 123.4, 123.6, 128.2, 128.3, 129.2, 131.2, 133.6, 145.7, 158.9, 169.6; MS (EI) *m/z* 407(M<sup>+</sup>); HRMS (EI) calcd for C<sub>26</sub>H<sub>21</sub>N<sub>3</sub>S, 407.1456; found, 407.1433.

### **4-Phenyl-2-(pyridin-2-yl)-N,N-di-p-tolyl-4,5-dihydrothiazol-5-amine (8f)**

**8f** (1.482 g, 68%) as a yellow solid (mp: 50-51 °C); IR (KBr) 3421, 2920, 1604, 1508, 1240, 1033, 964, 788, 730, 574 cm<sup>-1</sup>; <sup>1</sup>H NMR (400 MHz, CDCl<sub>3</sub>) δ 2.26 (s, 6H), 5.99 (d, *J* = 4.6 Hz, 1H), 6.29 (d, *J* = 4.6 Hz, 1H), 6.87 (d, *J* = 4.1 Hz, 1H), 6.95-6.97 (m, 3H), 7.05 (d, *J* = 8.2 Hz, 4H), 7.27-7.28 (m, 1H), 7.34 (d, *J* = 4.1 Hz, 4H), 3.37-3.39 (m, 1H), 7.72-7.76 (td, 1H), 8.08 (d, *J* = 7.8 Hz, 1H), 8.68 (d, *J* = 5.5 Hz, 1H); <sup>13</sup>C (400 MHz, CDCl<sub>3</sub>) δ 20.28, 80.77, 123.22, 123.66, 124.58, 126.56, 128.13, 128.63, 128.98, 129.42, 130.05, 133.39, 136.76, 143.71, 146.17, 149.46, 151.07; MS (EI) *m/z* 435(M<sup>+</sup>); HRMS (EI) calcd for C<sub>28</sub>H<sub>25</sub>N<sub>4</sub>S, 435.1769; found, 435.1799.

## Photophysical properties of 5-*N*-arylaminothiazoles

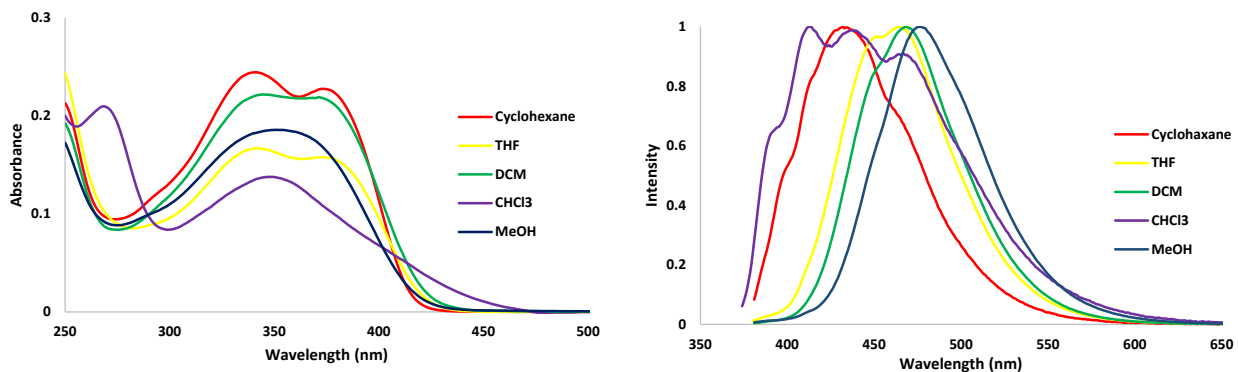

Fig. S1 Absorption (left) and emission properties of **4a**.

Table S1 Spectroscopic data of **4a**.

| Thiazole | Solv.             | UV-Vis <sup>a</sup>         |                | Flourescence <sup>b</sup>    |                            |                                  | Stoke shift<br>(cm <sup>-1</sup> ) [nm] |
|----------|-------------------|-----------------------------|----------------|------------------------------|----------------------------|----------------------------------|-----------------------------------------|
|          |                   | $\lambda_{\text{abs}}$ (nm) | log $\epsilon$ | $\lambda_{\text{ex}}$ (nm)   | $\lambda_{\text{em}}$ (nm) | $\Phi_{\text{F}}$ <sup>b,c</sup> |                                         |
|          | Solid             | 434                         |                | 435                          | 475                        | 0.03                             | 1988 [41]                               |
|          | Cyclohexane       | 341<br><b>373</b>           | 4.36           | 288<br>342 (s)<br><b>366</b> | <b>432</b><br>465 (s)      | 0.03                             | 3661 [59]                               |
|          | THF               | 342<br><b>372</b>           | 4.19           | 342 (s)<br><b>365</b>        | 452 (s)<br><b>464</b>      | 0.05                             | 5330 [92]                               |
|          | DCM               | 345<br>371                  | 4.34           | 366                          | 468                        | 0.05                             | 5586 [97]                               |
|          | CHCl <sub>3</sub> | 268<br><b>349</b>           | 4.14           | 292<br><b>359</b>            | 413<br>439<br><b>467</b>   | 0.04                             | 7240 [118]                              |
|          | MeOH              | 351                         | 4.26           | 366                          | 476                        | 0.04                             | 7481 [125]                              |

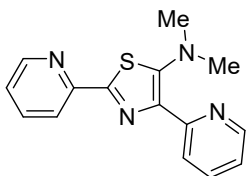

**4a**

[solute] = 10<sup>-5</sup>M

<sup>a</sup>Measured on V-770

<sup>b</sup>Measured on FP-8500

<sup>c</sup>Excited at  $\lambda_{\text{ex}}$

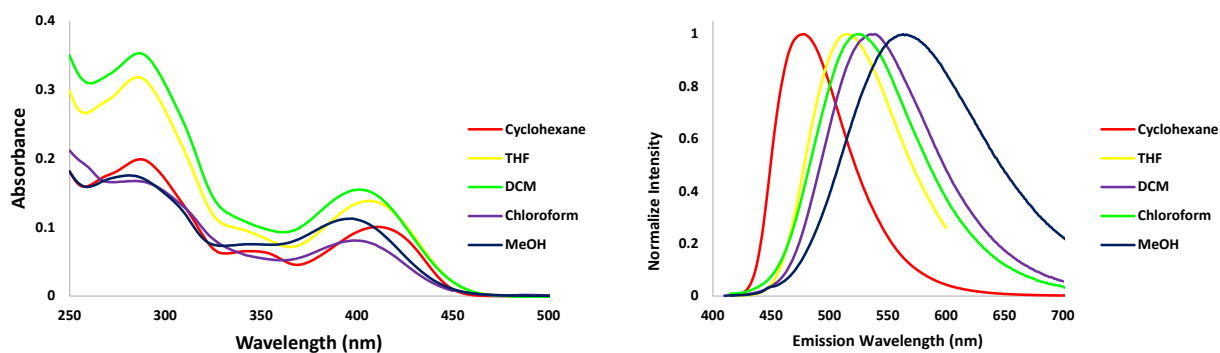

Fig. S2 Absorption (left) and emission (right) spectra of **4b**.

Table S2 Spectroscopic data of **4b**.

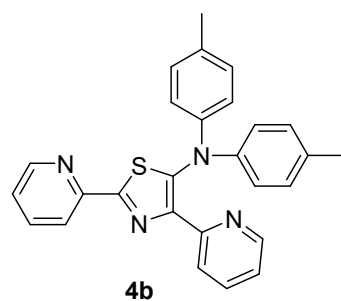

| Thiazole | Solv.             | UV-Vis <sup>a</sup>         |                 | Flourescence <sup>b</sup>  |                            |                                | Stoke shift<br>(cm <sup>-1</sup> ) [nm] |
|----------|-------------------|-----------------------------|-----------------|----------------------------|----------------------------|--------------------------------|-----------------------------------------|
|          |                   | $\lambda_{\text{abs}}$ (nm) | $\log \epsilon$ | $\lambda_{\text{ex}}$ (nm) | $\lambda_{\text{em}}$ (nm) | $\Phi_{\text{F}}^{\text{b,c}}$ |                                         |
|          | Solid             | 442                         |                 | 439                        | 495                        | 0.21                           | 2411 [53]                               |
|          | Cyclohexane       | 411                         | 4.30            | 410                        | 478                        | 0.41                           | 3410 [67]                               |
|          | THF               | 407                         | 4.14            | 406                        | 515                        | 0.21                           | 5152 [108]                              |
|          | DCM               | 402                         | 4.19            | 398                        | 539                        | 0.16                           | 6323 [137]                              |
|          | CHCl <sub>3</sub> | 398                         | 3.90            | 397                        | 525                        | 0.13                           | 6078 [127]                              |
|          | MeOH              | 397                         | 4.26            | 395                        | 563                        | 0.15                           | 7427 [166]                              |

[solute] = 10<sup>-5</sup>M

<sup>a</sup>Measured on V-770

<sup>b</sup>Measured on FP-8500

<sup>c</sup>Excited at  $\lambda_{\text{ex}}$

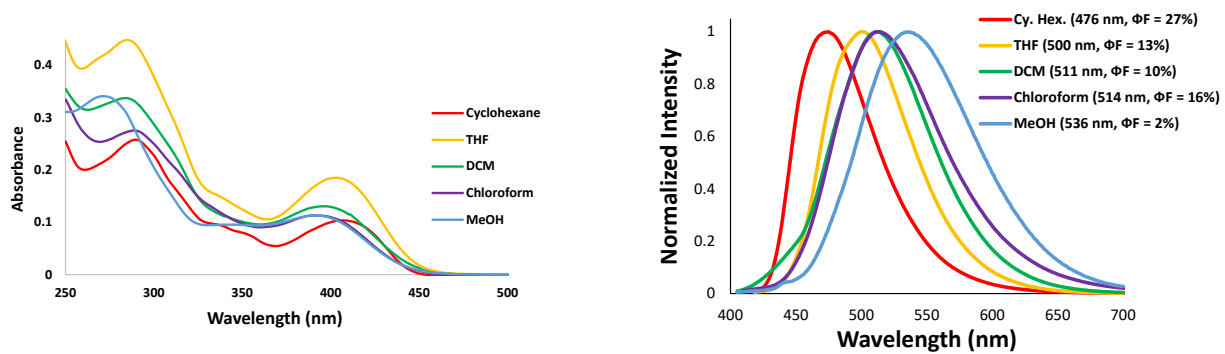

Fig. S3 Absorption (left) and emission (right) spectra of **4c**.

Table S3 Spectroscopic data of **4c**.

| Thiazole | Solv.             | UV-Vis <sup>a</sup>               |                 | Flourescence <sup>b</sup>        |                                  |                                | Stoke shift<br>(cm <sup>-1</sup> ) [nm] |
|----------|-------------------|-----------------------------------|-----------------|----------------------------------|----------------------------------|--------------------------------|-----------------------------------------|
|          |                   | $\lambda_{\text{abs}}(\text{nm})$ | $\log \epsilon$ | $\lambda_{\text{ex}}(\text{nm})$ | $\lambda_{\text{em}}(\text{nm})$ | $\Phi_{\text{F}}^{\text{b,c}}$ |                                         |
|          | Solid             | 444                               | -               | 437                              | 524                              | 0.06                           | 3438 [80]                               |
|          | Cyclohexane       | 240<br>407                        | 4.01            | 283<br>407                       | 474                              | 0.27                           | 3473 [67]                               |
|          | THF               | 285<br>403                        | 4.26            | 284<br>398                       | 500                              | 0.13                           | 4813 [97]                               |
|          | DCM               | 284<br>397                        | 4.11            | 280<br>389                       | 511                              | 0.10                           | 5619 [113]                              |
|          | CHCl <sub>3</sub> | 289<br>391                        | 4.05            | 252<br>285<br>395                | 514                              | 0.16                           | 6120 [123]                              |
|          | MeOH              | 271<br>391                        | 4.05            | 279<br>389                       | 536                              | 0.02                           | 6918 [145]                              |

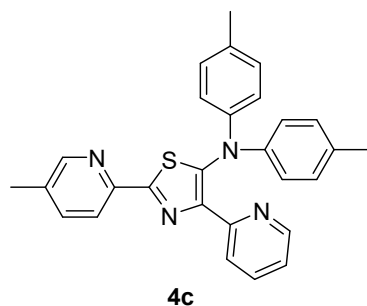

[solute] = 10<sup>-5</sup>M

<sup>a</sup>Measured on V-770

<sup>b</sup>Measured on FP-8500

<sup>c</sup>Excited at  $\lambda_{\text{ex}}$

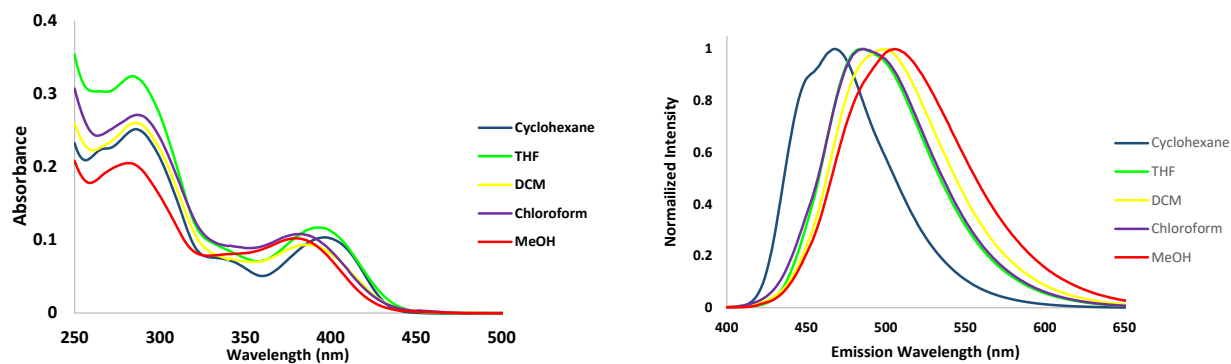

Fig. S4 Absorption (left) and emission (right) spectra of **4d**.

Table S4 Spectroscopic data of **4d**.

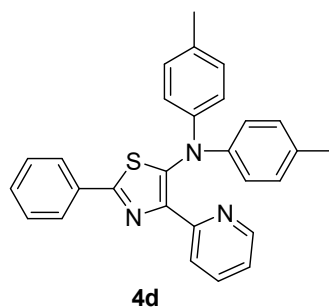

| Thiazole | Solv.             | UV-Vis <sup>a</sup>               |                 | Flourescence <sup>b</sup>        |                                               |                                | Stoke shift<br>(cm <sup>-1</sup> ) [nm] |
|----------|-------------------|-----------------------------------|-----------------|----------------------------------|-----------------------------------------------|--------------------------------|-----------------------------------------|
|          |                   | $\lambda_{\text{abs}}(\text{nm})$ | $\log \epsilon$ | $\lambda_{\text{ex}}(\text{nm})$ | $\lambda_{\text{em}}(\text{nm})^{\text{b,c}}$ | $\Phi_{\text{F}}^{\text{b,c}}$ |                                         |
|          | Solid             | 444                               |                 | 279<br>369<br>437                | 475                                           | 0.21                           | 1469 [31]                               |
|          | Cyclohexane       | 286<br>397                        | 4.01            | 282<br>393                       | 468                                           | 0.29                           | 3821 [71]                               |
|          | THF               | 284<br>393                        | 4.06            | 281<br>390                       | 486                                           | 0.17                           | 4869 [93]                               |
|          | DCM               | 286<br>387                        | 3.97            | 282<br>380                       | 500                                           | 0.15                           | 5839 [93]                               |
|          | CHCl <sub>3</sub> | 287<br>381                        | 4.03            | 284<br>377                       | 486                                           | 0.20                           | 5670 [113]                              |
|          | MeOH              | 281<br>379                        | 4.00            | 278<br>375                       | 505                                           | 0.12                           | 6583 [126]                              |

[solute] = 10<sup>-5</sup>M    <sup>a</sup>Measured on V-770    <sup>b</sup>Measured on FP-8500    <sup>c</sup>Excited at  $\lambda_{\text{ex}}$

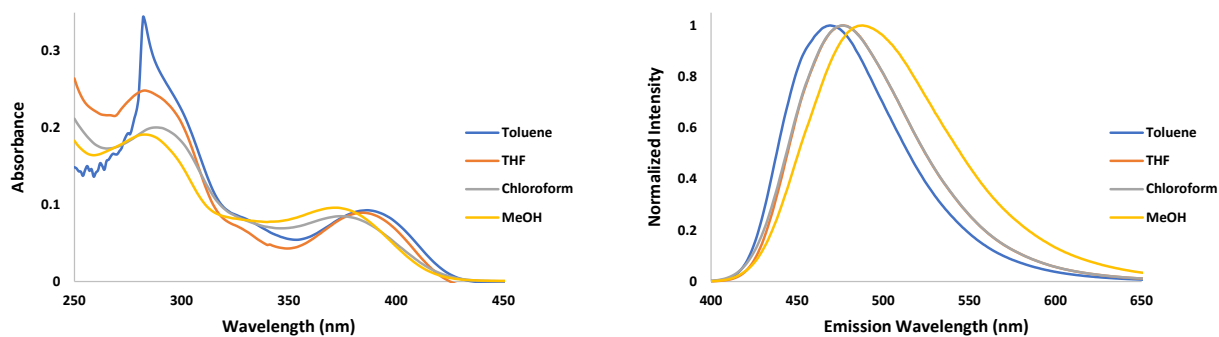

Fig. S5 Absorption (left) and emission (right) spectra of **4e**.

Table S5 Spectroscopic data of **4e**.

| Thiazole                                                                                        | Solv.             | UV-Vis <sup>a</sup>         |                | Flourescence <sup>b</sup>  |                            |                                | Stoke shift<br>(cm <sup>-1</sup> ) [nm] |
|-------------------------------------------------------------------------------------------------|-------------------|-----------------------------|----------------|----------------------------|----------------------------|--------------------------------|-----------------------------------------|
|                                                                                                 |                   | $\lambda_{\text{abs}}$ (nm) | log $\epsilon$ | $\lambda_{\text{ex}}$ (nm) | $\lambda_{\text{em}}$ (nm) | $\Phi_{\text{F}}^{\text{b,c}}$ |                                         |
| 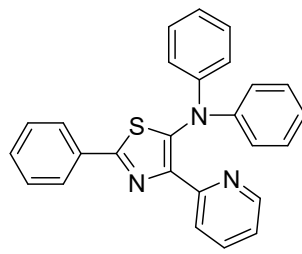<br><b>4e</b> | Solid             | 427                         |                | 326<br>363<br>428          | 469                        | 0.15                           | 2097 [42]                               |
|                                                                                                 | Toluene           | 282<br>386                  | 3.96           | 297<br>387                 | 469                        | 0.26                           | 4584 [83]                               |
|                                                                                                 | THF               | 283<br><b>384</b>           | 3.95           | 283<br><b>383</b>          | 477                        | 0.26                           | 5077 [93]                               |
|                                                                                                 | CHCl <sub>3</sub> | 288<br><b>374</b>           | 3.92           | 376                        | 476                        | 0.31                           | 5729 [102]                              |
|                                                                                                 | MeOH              | 283<br>372                  | 3.98           | 282<br>371                 | 488                        | 0.8                            | 6389 [116]                              |

[solute] = 10<sup>-5</sup>M

<sup>a</sup>Measured on V-770

<sup>b</sup>Measured on FP-8500

<sup>c</sup>Excited at  $\lambda_{\text{ex}}$



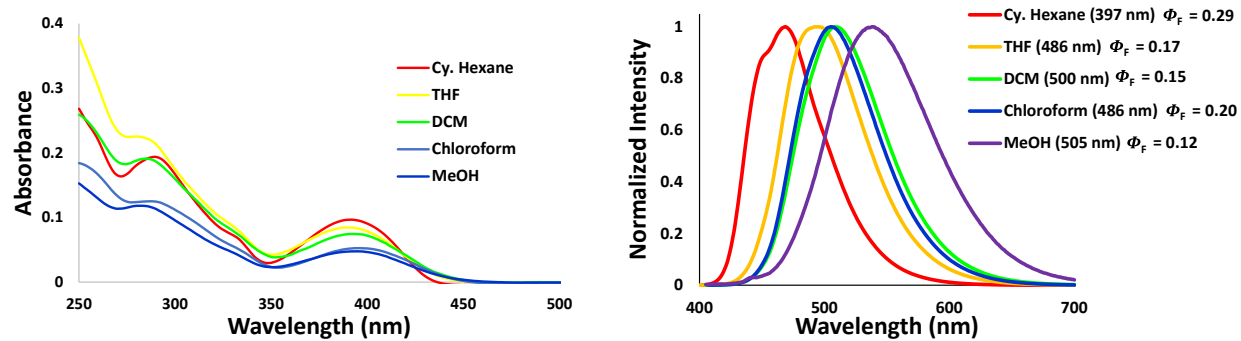

Fig. S6 Absorption (left) and emission (right) spectra of **4f**.

Table S6 Spectroscopic data of **4f**.

| Thiazole         | Solv.             | UV-Vis <sup>a</sup>         |                | Flourescence <sup>b</sup>  |                            |                       | Stoke shift<br>(cm <sup>-1</sup> ) [nm] |
|------------------|-------------------|-----------------------------|----------------|----------------------------|----------------------------|-----------------------|-----------------------------------------|
|                  |                   | $\lambda_{\text{abs}}$ (nm) | log $\epsilon$ | $\lambda_{\text{ex}}$ (nm) | $\lambda_{\text{em}}$ (nm) | $\Phi_F^{\text{b,c}}$ |                                         |
| <p><b>4f</b></p> | Solid             | 404                         |                | 275<br>365<br>431          | 475                        | 0.52                  |                                         |
|                  | Cyclohexane       | 289<br><b>391</b>           |                | 282<br><b>387</b>          | 469                        | 0.44                  |                                         |
|                  | THF               | 280<br><b>390</b>           | 3.92           | 281<br><b>385</b>          | 495                        | 0.46                  | 5439                                    |
|                  | DCM               | 285<br>392                  | 3.87           | 281<br>388                 | 508                        | 0.39                  | 5825                                    |
|                  | CHCl <sub>3</sub> | 287<br><b>396</b>           | 3.72           | 285<br><b>392</b>          | 505                        | 0.42                  | 5450                                    |
|                  | MeOH              | 282<br>395                  | 3.67           | 258<br>281<br>389          | 538                        | 0.12                  | 6729                                    |

[solute] = 10<sup>-5</sup>M    <sup>a</sup>Measured on V-770    <sup>b</sup>Measured on FP-8500    <sup>c</sup>Excited at  $\lambda_{\text{ex}}$

Spectroscopic data of zinc-thiazole **8a** in different solvent polarities

**Table S7** Spectroscopic data of zinc complex **8a** in different solvent polarities.

| Complex   | Solvent           | Uv         | $\lambda_{\text{ex}}$ | $\lambda_{\text{em}}$ | $\nu_{\text{ss}}(\text{nm})$ | $\Phi_{\text{F}}$ |
|-----------|-------------------|------------|-----------------------|-----------------------|------------------------------|-------------------|
| <b>8a</b> | CHCl <sub>3</sub> | 274<br>463 | 463                   | 590                   | 127                          | 0.36              |
|           | DCM               | 271<br>459 | 458                   | 608                   | 149                          | 0.31              |
|           | THF               | 282<br>390 | 384                   | 497                   | 107                          | 0.46              |
|           | MeOH              | 282<br>391 | 388                   | 538                   | 147                          | 0.66              |

-----  
Conc. 10<sup>-5</sup> M

X-ray crystallography data of thiazole and nickel-thiazole complex.

**Table S8.** X-ray crystallography data of thiazole **4c**.

|                                                                            |                                                  |
|----------------------------------------------------------------------------|--------------------------------------------------|
| Chemical formula                                                           | C <sub>28</sub> H <sub>24</sub> N <sub>4</sub> S |
| $M_r$                                                                      | 448.57                                           |
| Crystal system, space group                                                | Triclinic, $P\bar{1}$                            |
| Temperature (K)                                                            | 193                                              |
| $a, b, c$ (Å)                                                              | 9.407 (3), 11.689 (4), 12.393 (4)                |
| $\alpha, \beta, \gamma$ (°)                                                | 115.971 (4), 102.307 (2), 91.501 (2)             |
| $V$ (Å <sup>3</sup> )                                                      | 1185.8 (7)                                       |
| $Z$                                                                        | 2                                                |
| Radiation type                                                             | Mo $K\alpha$                                     |
| $\mu$ (mm <sup>-1</sup> )                                                  | 0.16                                             |
| Crystal size (mm)                                                          | 0.43 × 0.37 × 0.34                               |
| Diffractometer                                                             | Rigaku Mercury CCD (2x2 bin mode)                |
| Absorption correction                                                      | Numerical                                        |
| $T_{\min}, T_{\max}$                                                       | 0.872, 0.921                                     |
| No. of measured, independent and observed [ $I > 2\sigma(I)$ ] reflections | 10688, 5374, 3854                                |
| $R_{\text{int}}$                                                           | 0.027                                            |
| $(\sin \theta/\lambda)_{\text{max}}$ (Å <sup>-1</sup> )                    | 0.650                                            |
| $R[F^2 > 2\sigma(F^2)], wR(F^2), S$                                        | 0.047, 0.135, 0.97                               |
| No. of reflections                                                         | 5374                                             |
| No. of parameters                                                          | 301                                              |
| H-atom treatment                                                           | H-atom parameters constrained                    |
| $\Delta\rho_{\text{max}}, \Delta\rho_{\text{min}}$ (e Å <sup>-3</sup> )    | 0.25, -0.32                                      |

**Table S9** X-ray crystallography data of nickel-thiazole complex **7c**.

|                                                                            |                                                                    |
|----------------------------------------------------------------------------|--------------------------------------------------------------------|
| Chemical formula                                                           | C <sub>28</sub> H <sub>24</sub> Cl <sub>2</sub> N <sub>4</sub> NiS |
| $M_r$                                                                      | 578.18                                                             |
| Crystal system, space group                                                | Monoclinic, $P2_1/n$                                               |
| Temperature (K)                                                            | 293                                                                |
| $a, b, c$ (Å)                                                              | 15.9050 (11), 8.6642 (4), 20.5670 (9)                              |
| $\beta$ (°)                                                                | 107.528 (6)                                                        |
| $V$ (Å <sup>3</sup> )                                                      | 2702.6 (3)                                                         |
| $Z$                                                                        | 4                                                                  |
| Radiation type                                                             | Mo $K\alpha$                                                       |
| $\mu$ (mm <sup>-1</sup> )                                                  | 1.02                                                               |
| Crystal size (mm)                                                          | 0.17 × 0.11 × 0.11                                                 |
| Diffractometer                                                             | Rigaku Mercury CCD (2x2 bin mode)                                  |
| Absorption correction                                                      | Numerical                                                          |
| $T_{\min}, T_{\max}$                                                       | 0.846, 0.896                                                       |
| No. of measured, independent and observed [ $I > 2\sigma(I)$ ] reflections | 19039, 4754, 3743                                                  |
| $R_{\text{int}}$                                                           | 0.102                                                              |
| $(\sin \theta/\lambda)_{\text{max}}$ (Å <sup>-1</sup> )                    | 0.650                                                              |
| $R[F^2 > 2\sigma(F^2)], wR(F^2), S$                                        | 0.068, 0.148, 1.087                                                |
| No. of reflections                                                         | 4754                                                               |
| No. of parameters                                                          | 328                                                                |
| H-atom treatment                                                           | H-atom parameters constrained                                      |
| $\Delta\rho_{\text{max}}, \Delta\rho_{\text{min}}$ (e Å <sup>-3</sup> )    | 0.84, -0.74                                                        |

# ESI-Mass analysis spectra

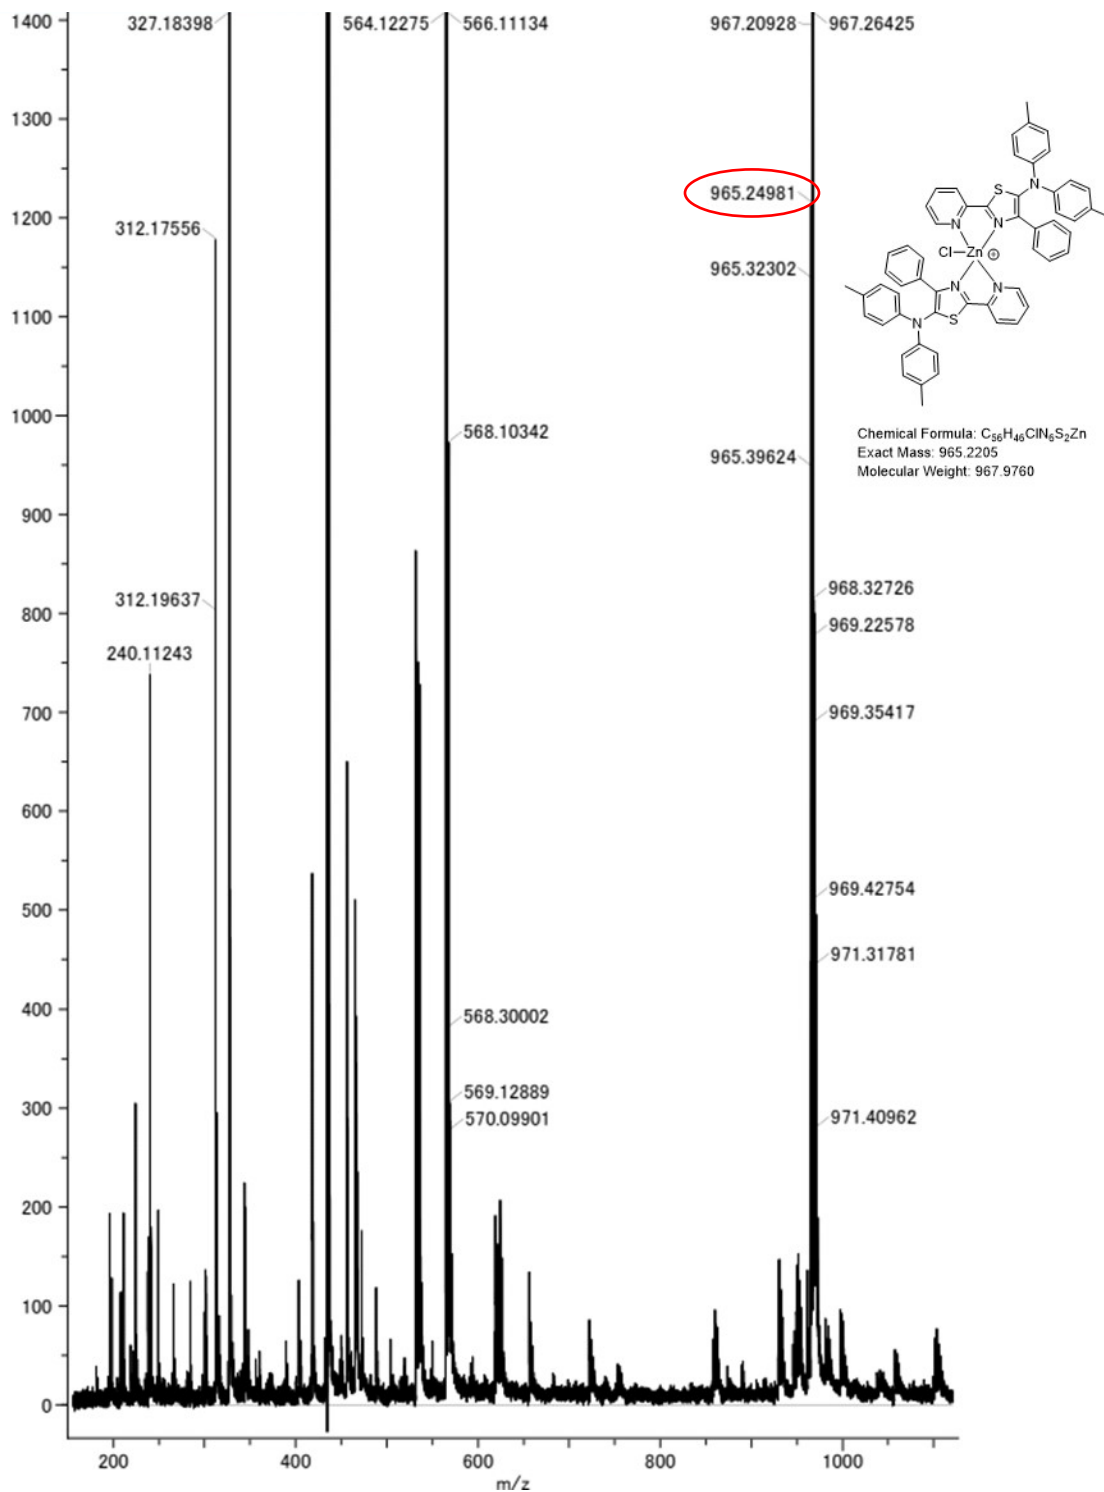

Fig. S7 ESI-Mass analysis spectra of **8a**.

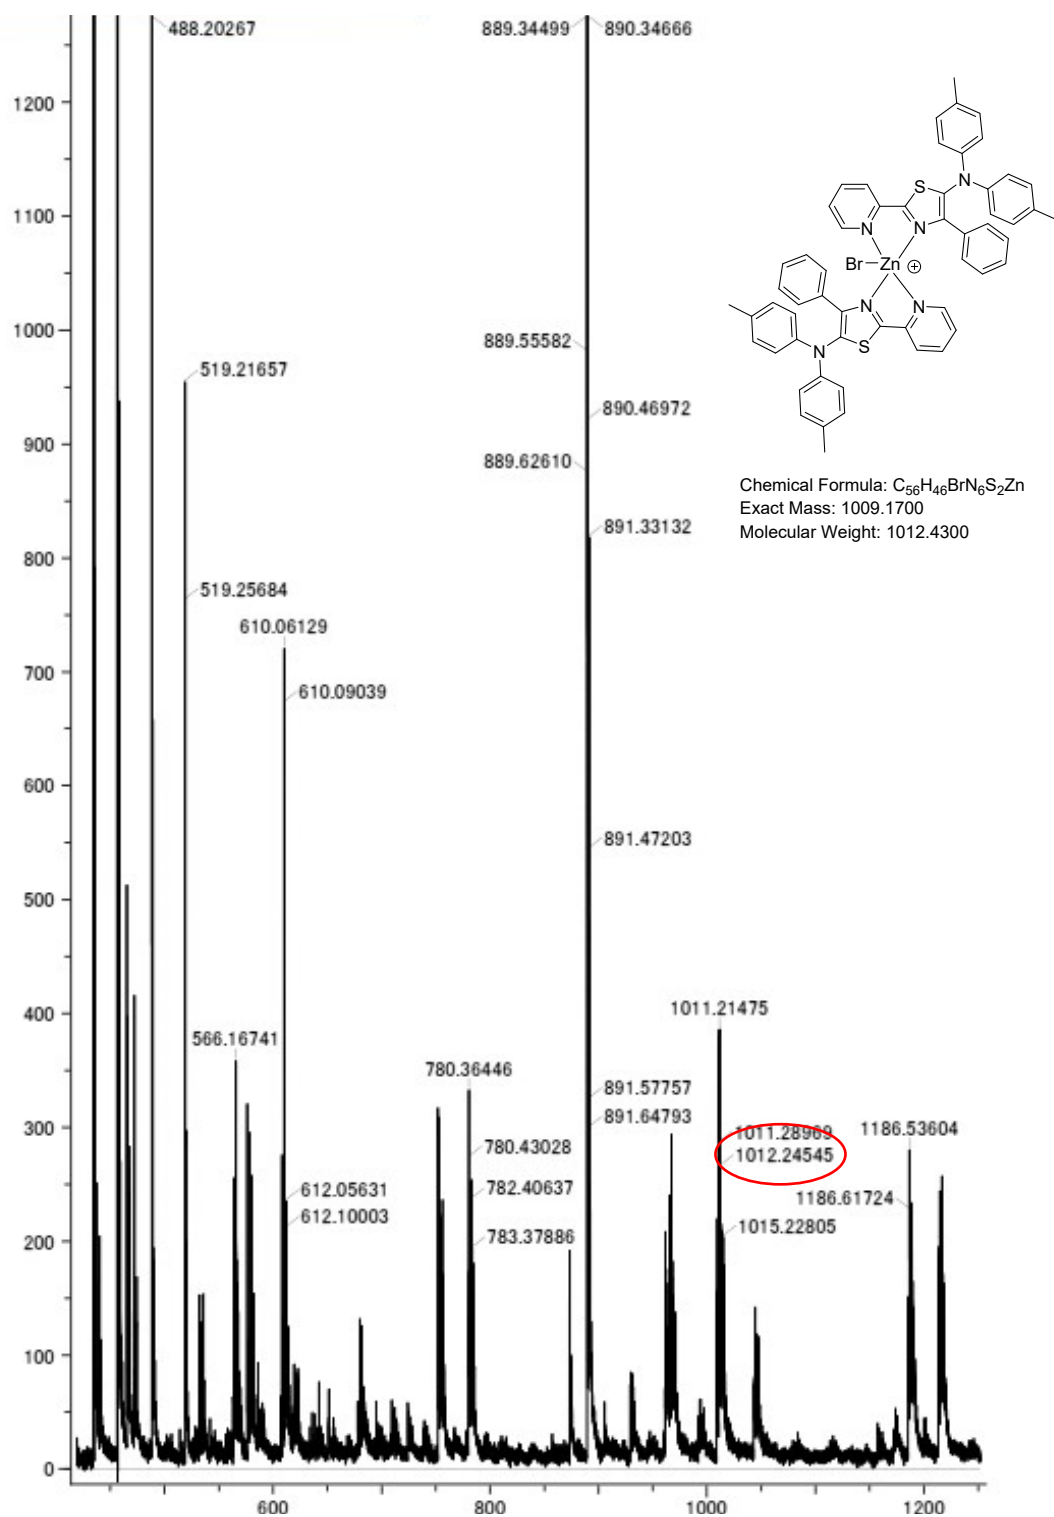

Fig. S8. ESI-Mass analysis of **8b**.

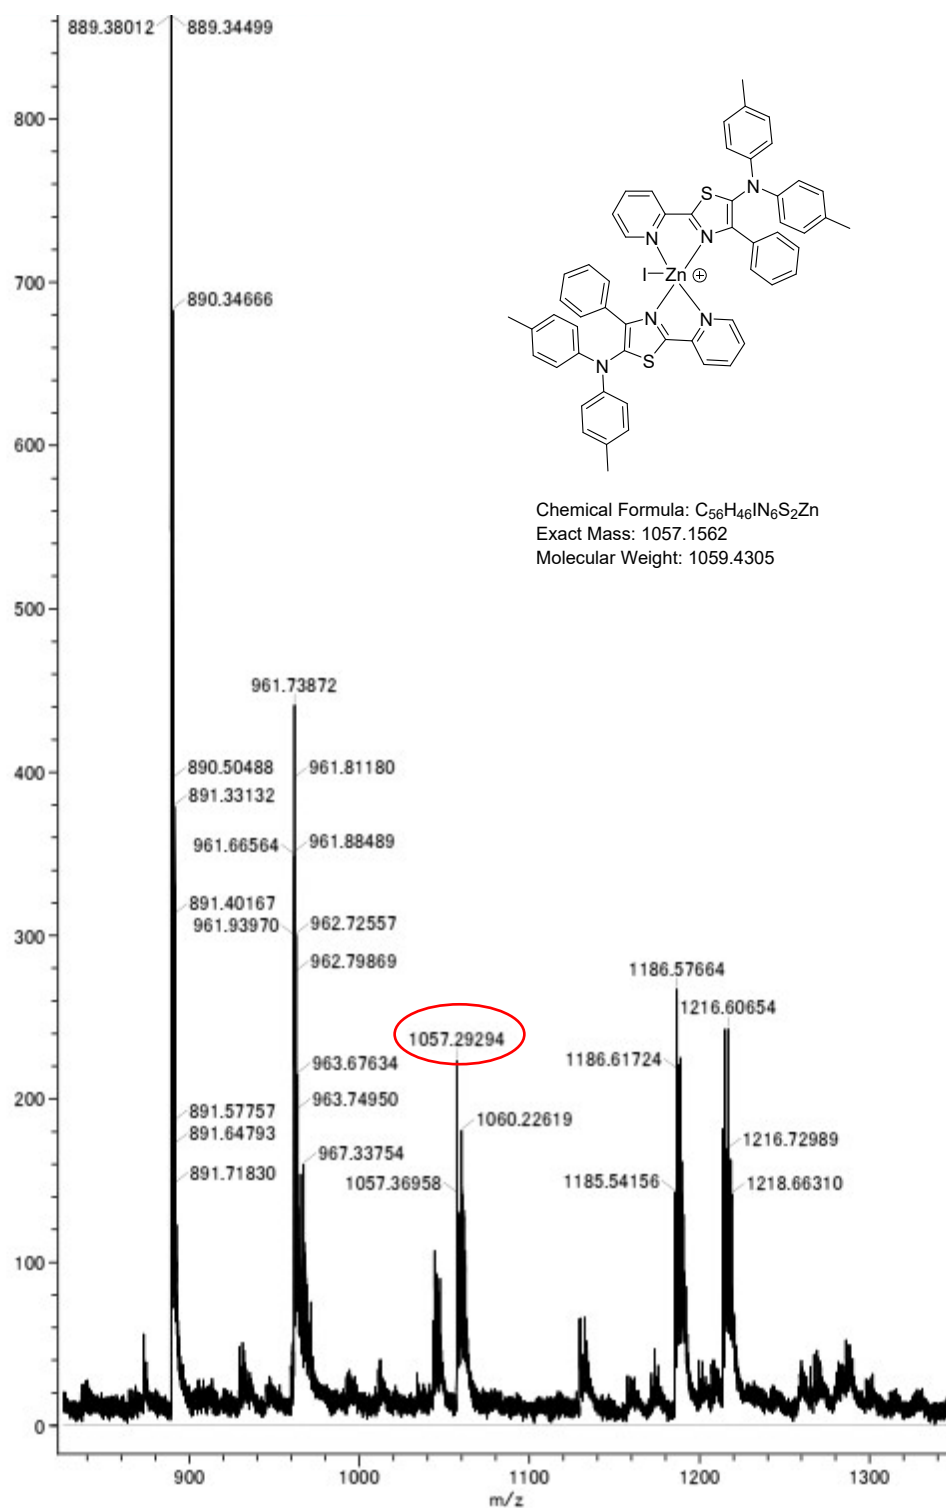

Fig. S9. ESI-Mass analysis of **8c**.

<sup>1</sup>H NMR charts for 5-N-arylaminothiazoles, dipyrromethene type ligands, and zinc-thiazole complexes.

### 5-aminothiazole **4a**

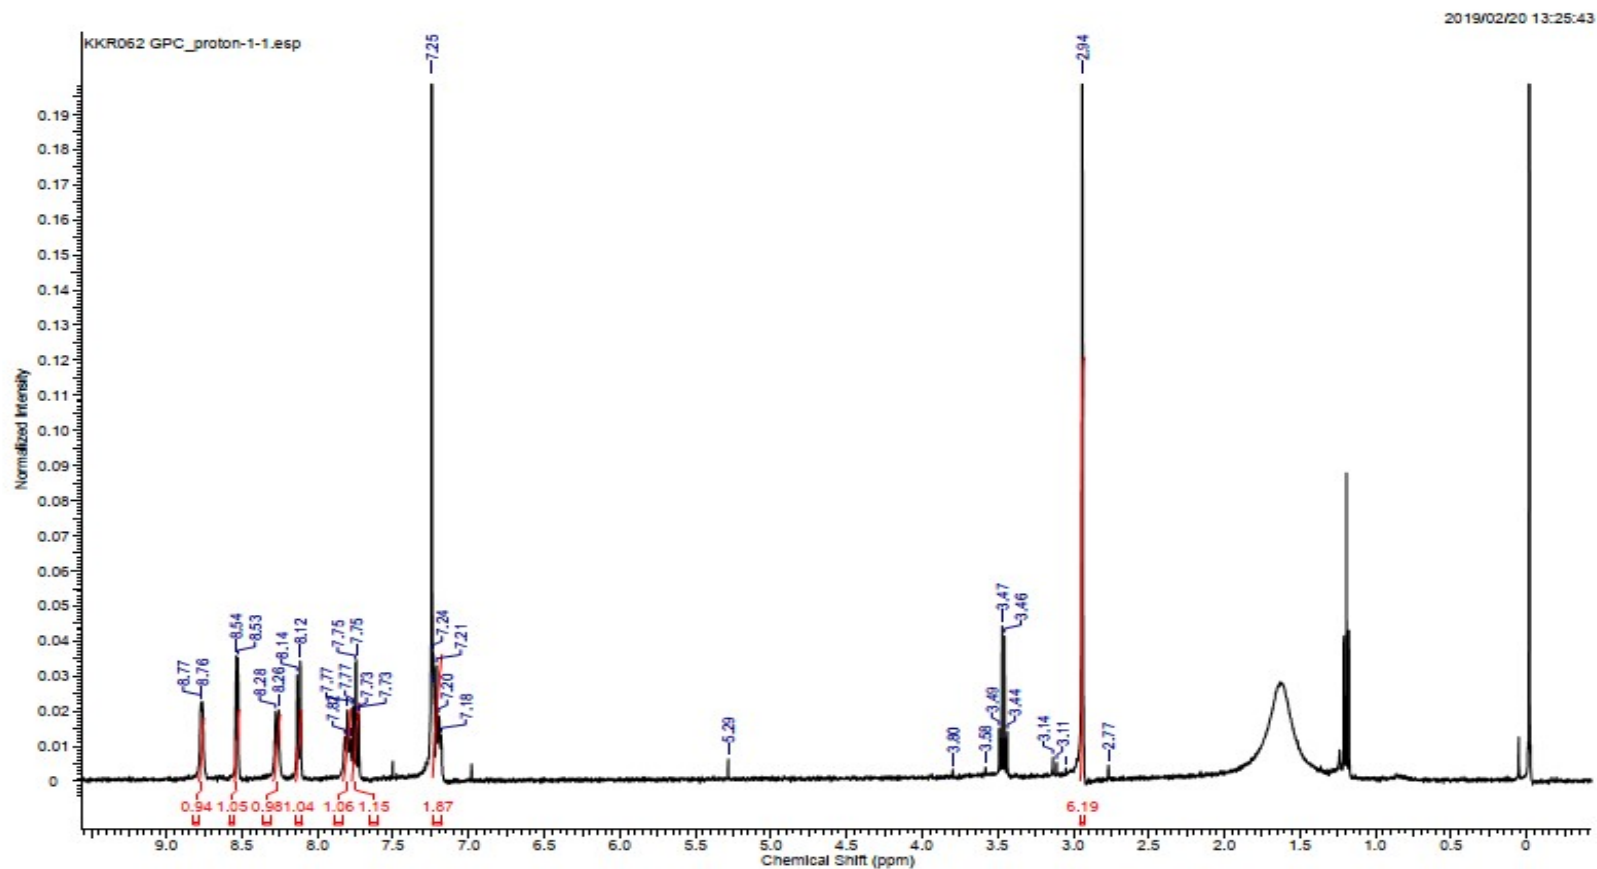



# 5-aminothiazole **4b**

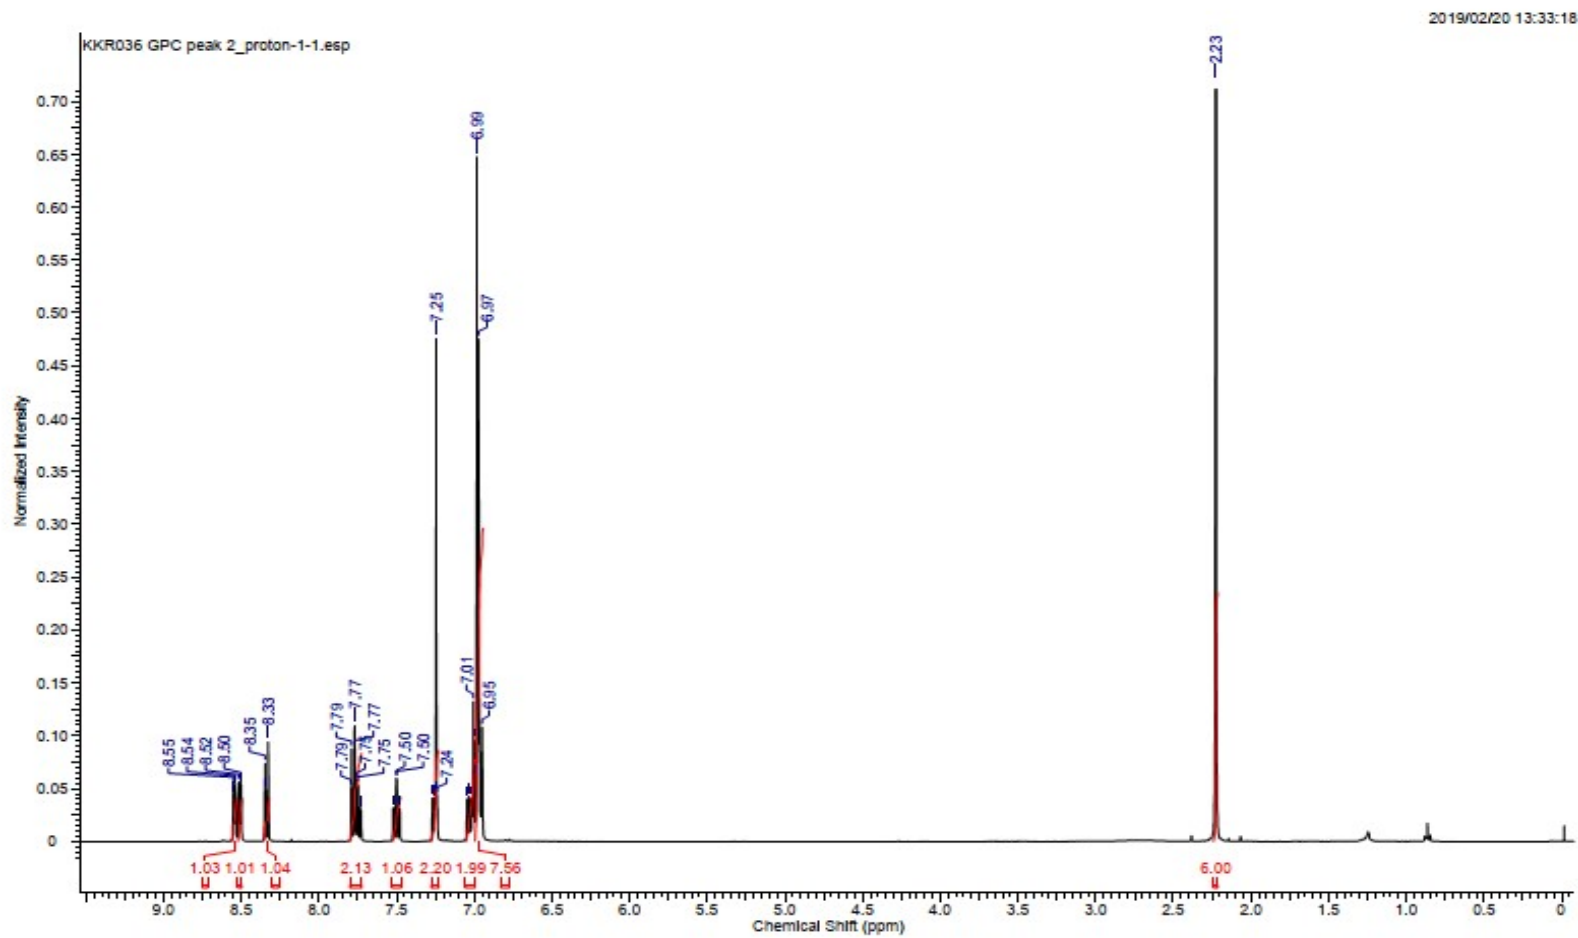

# 5-aminothiazole 4c

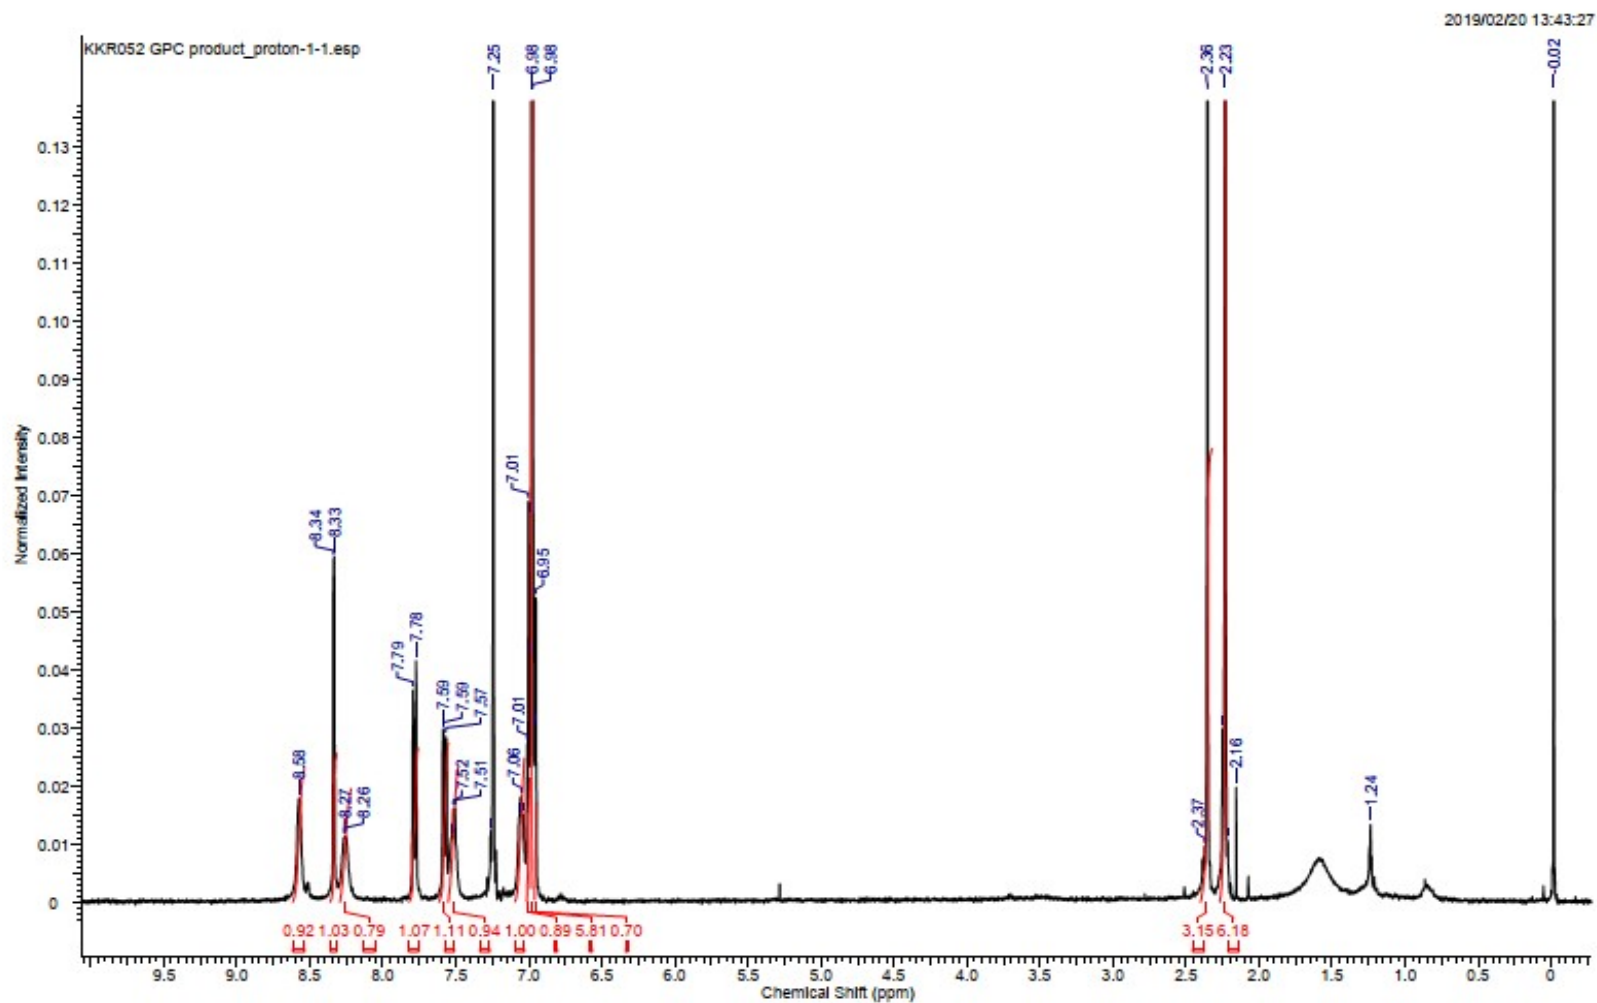

# 5-aminothiazole **4d**

2019/02/20 13:15:49

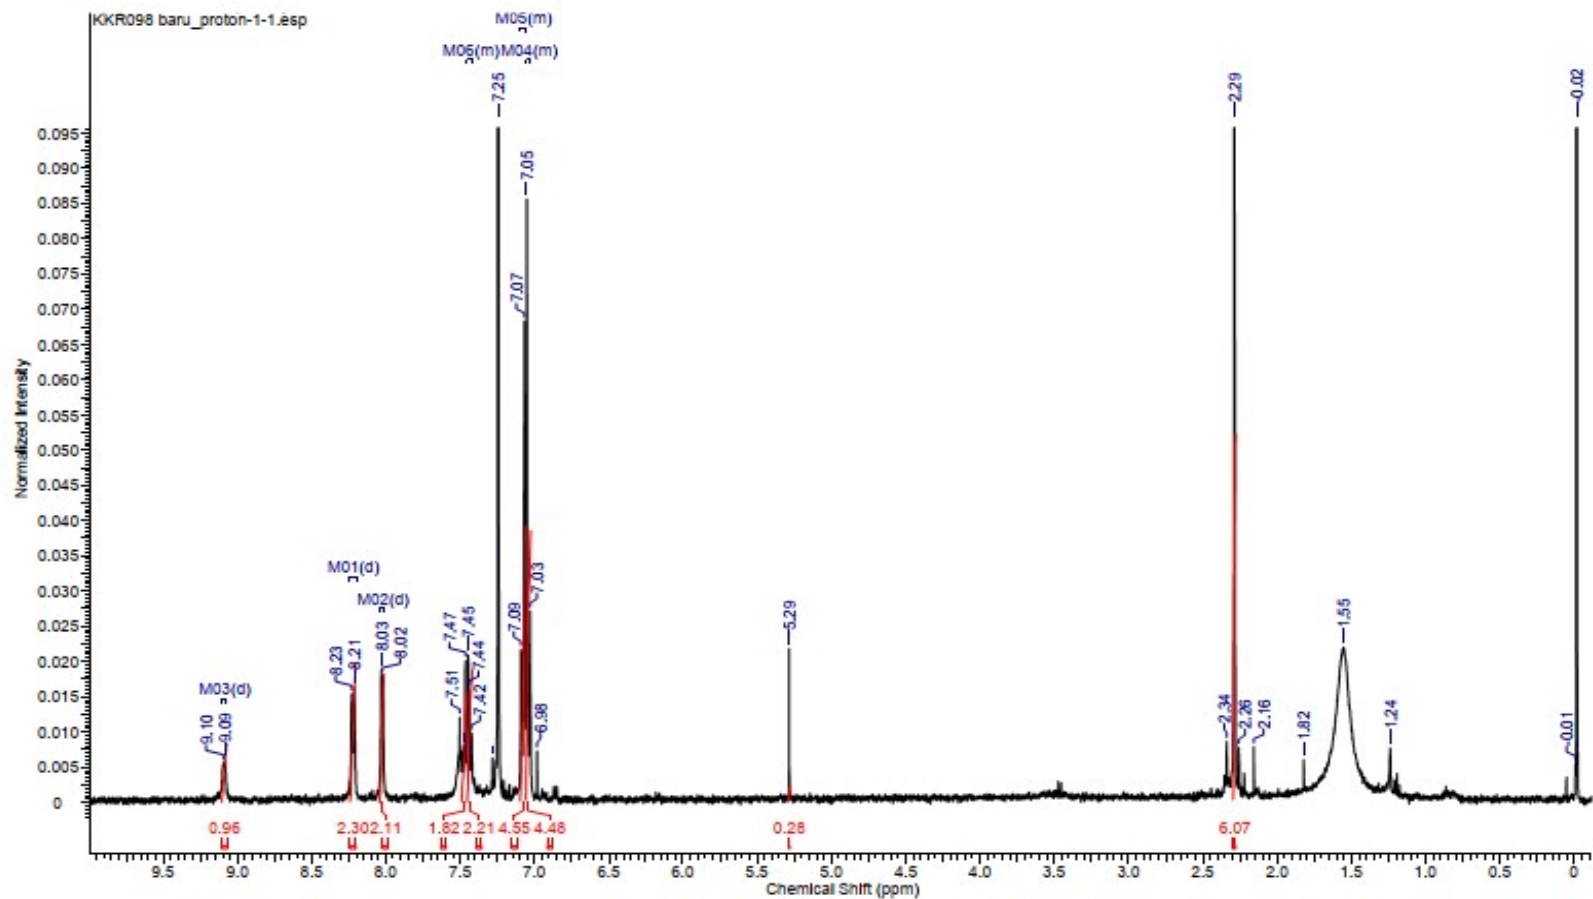

# 5-aminothiazole 4e

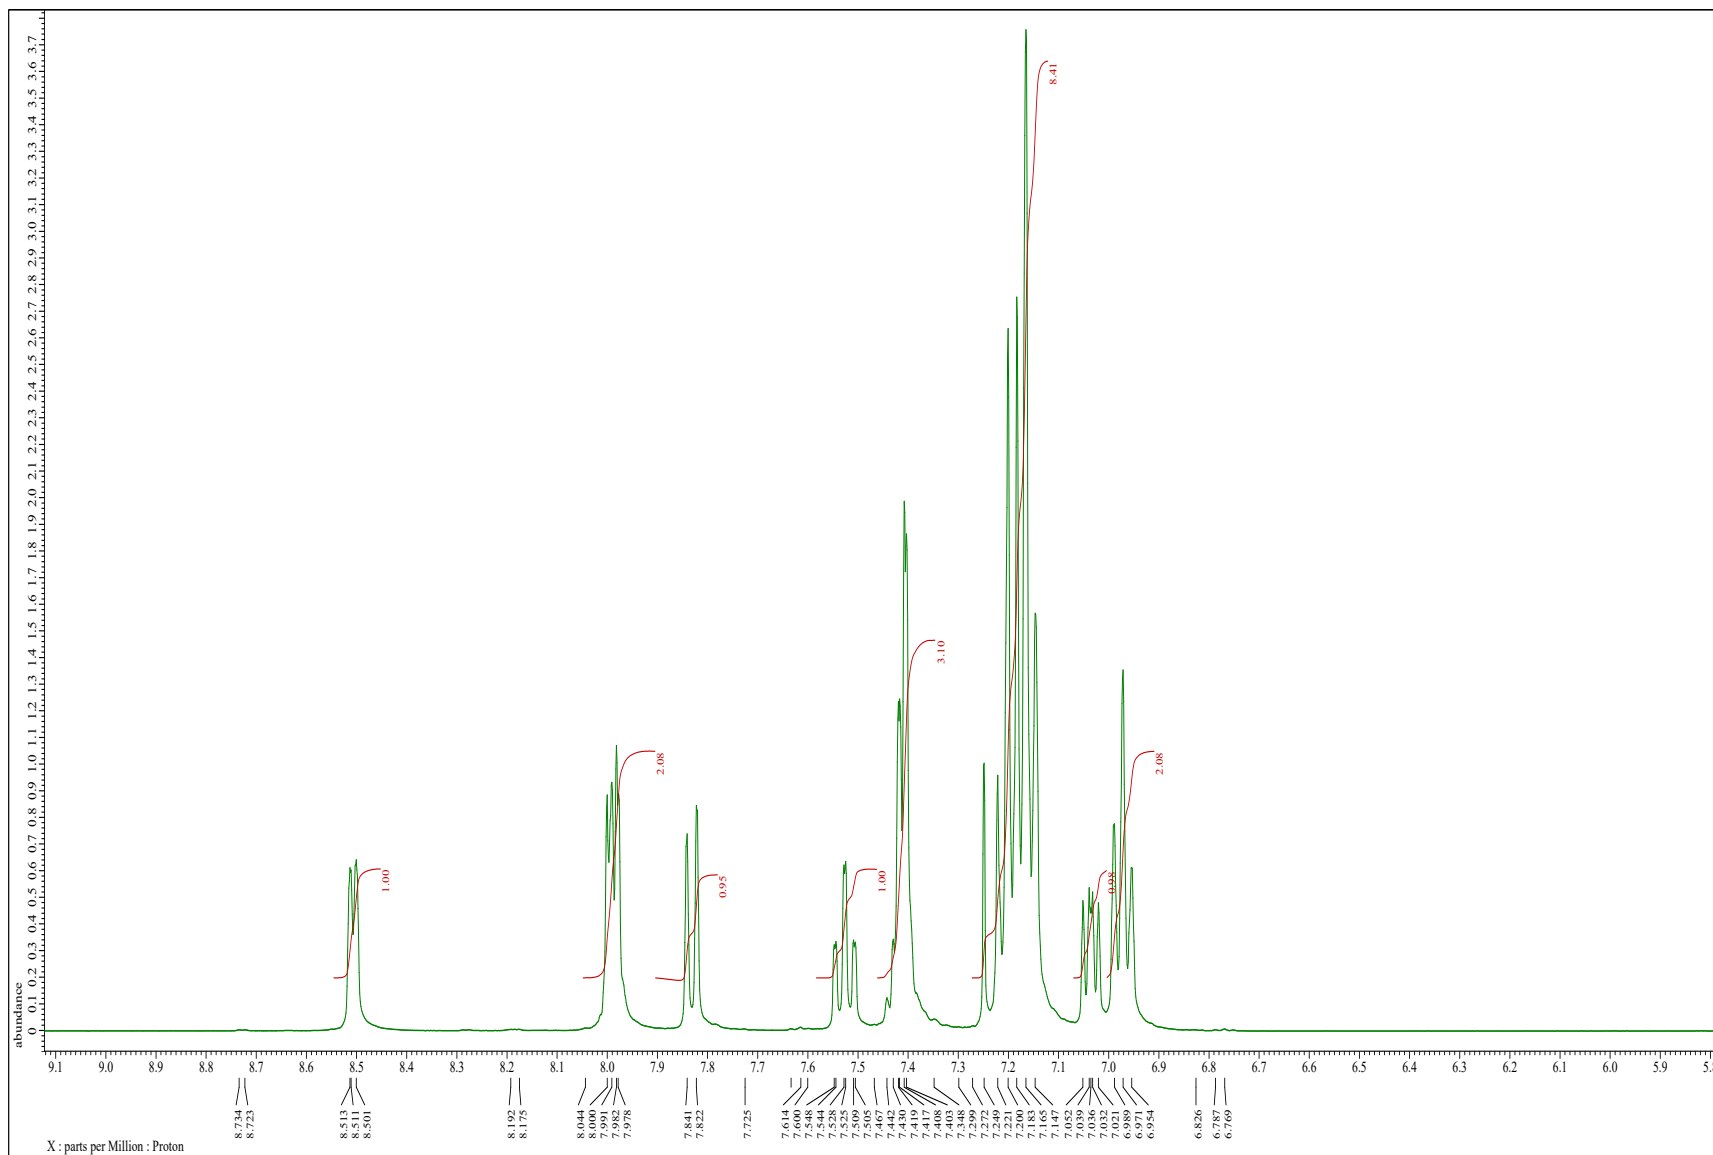

# 5-aminothiazole 4f

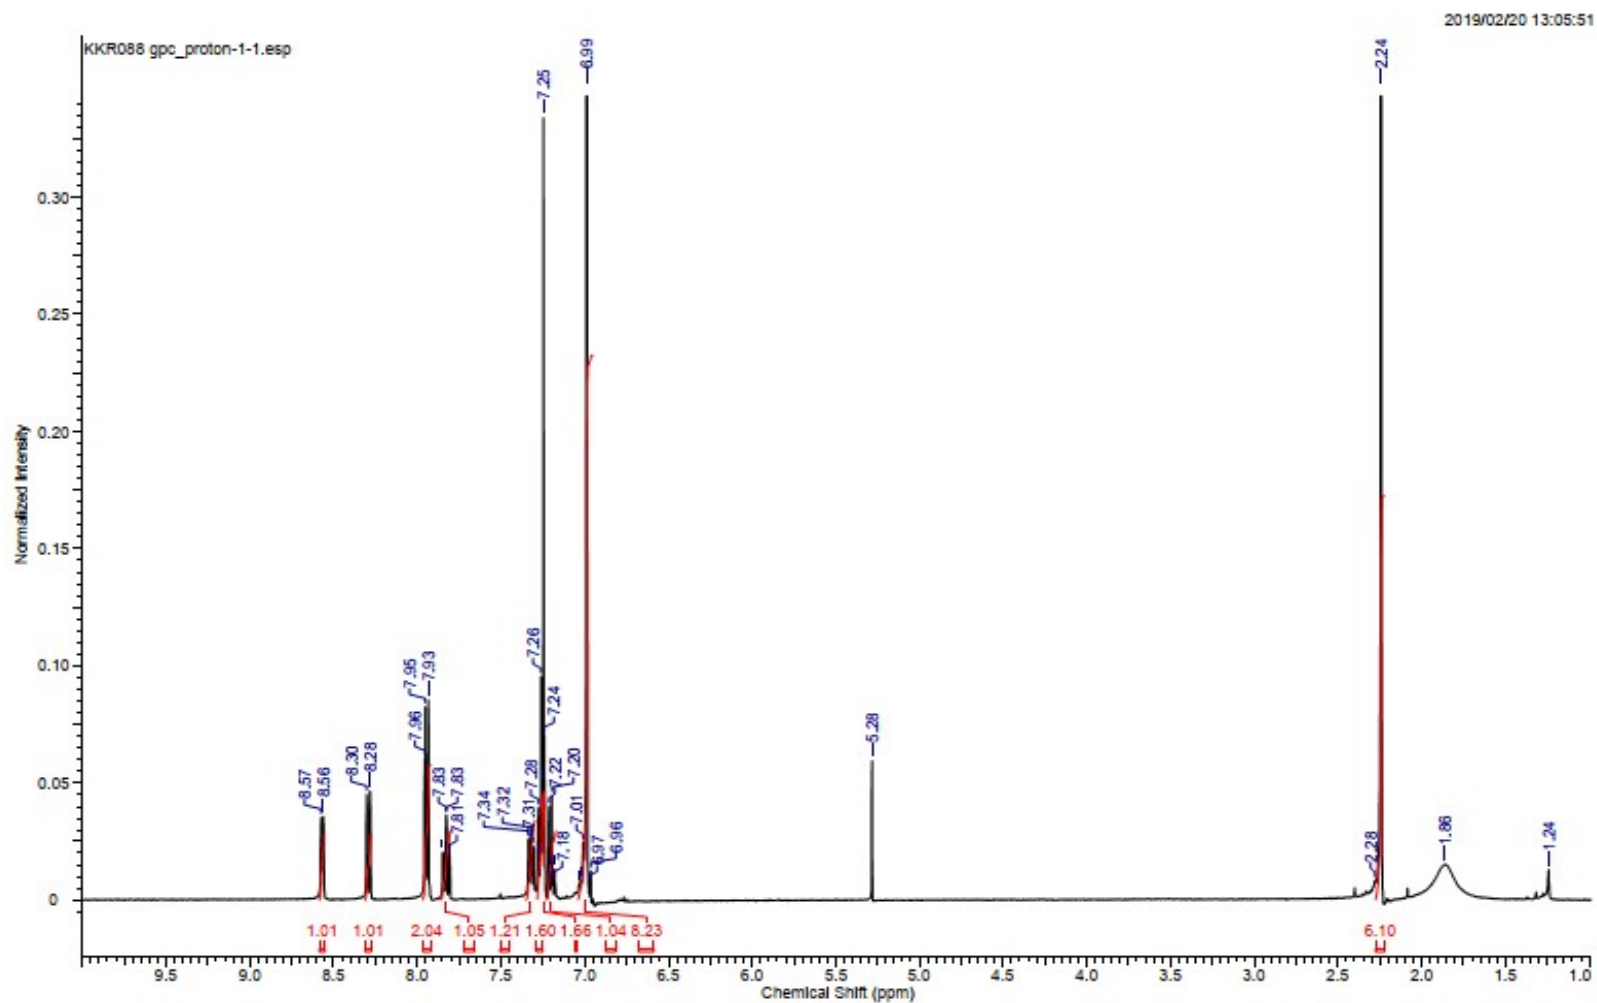

# Dipyrromethene type ligand 6a

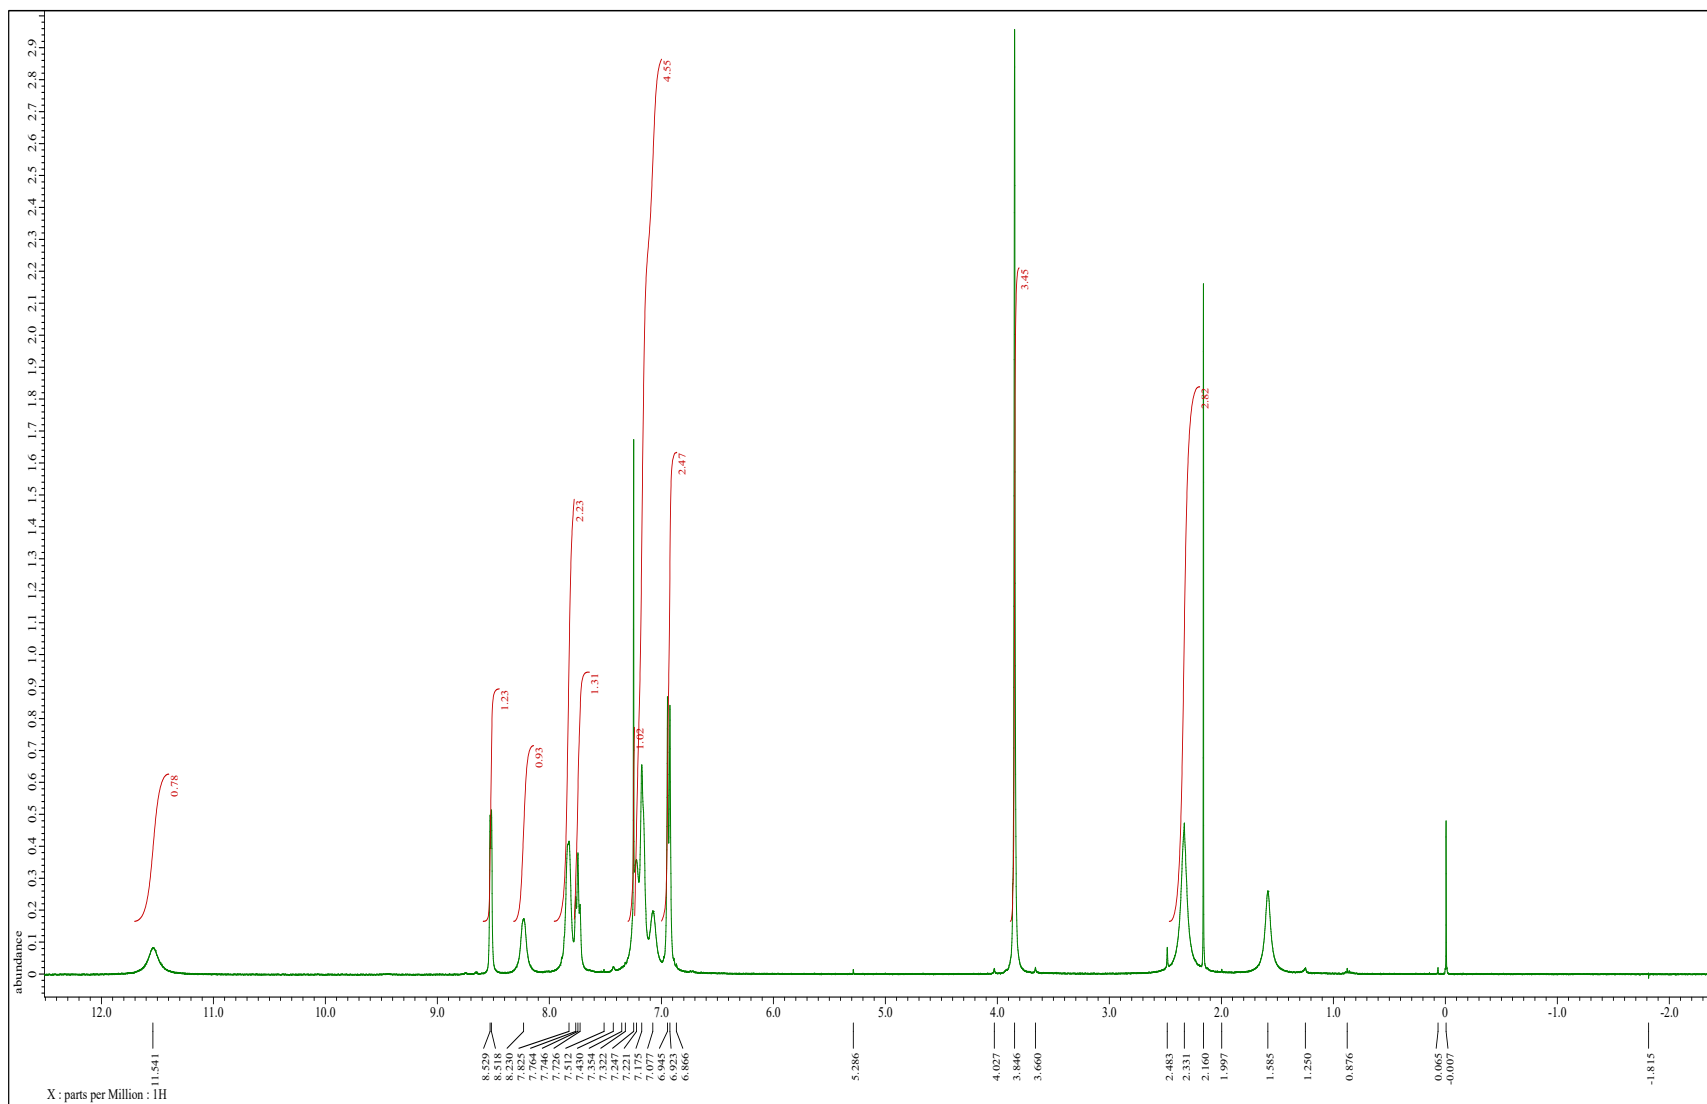

# Dipyrromethene type ligand **6b**

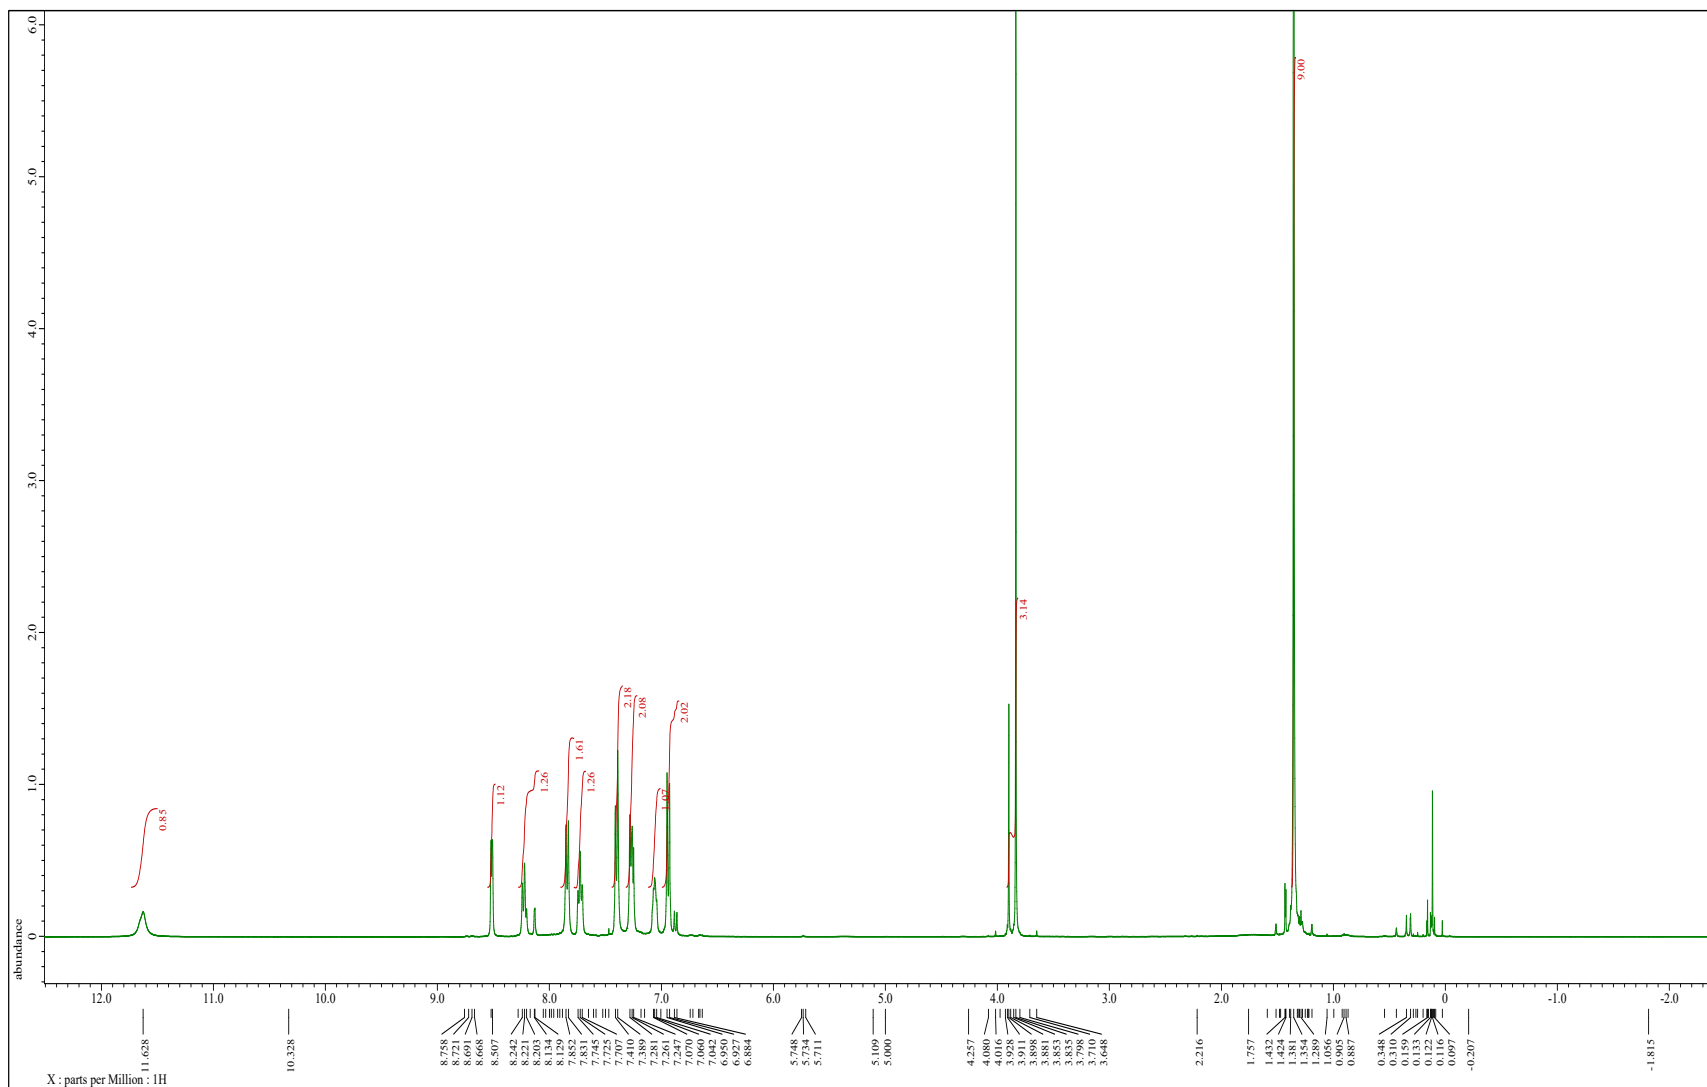

# Zinc-thiazole complex **8a**

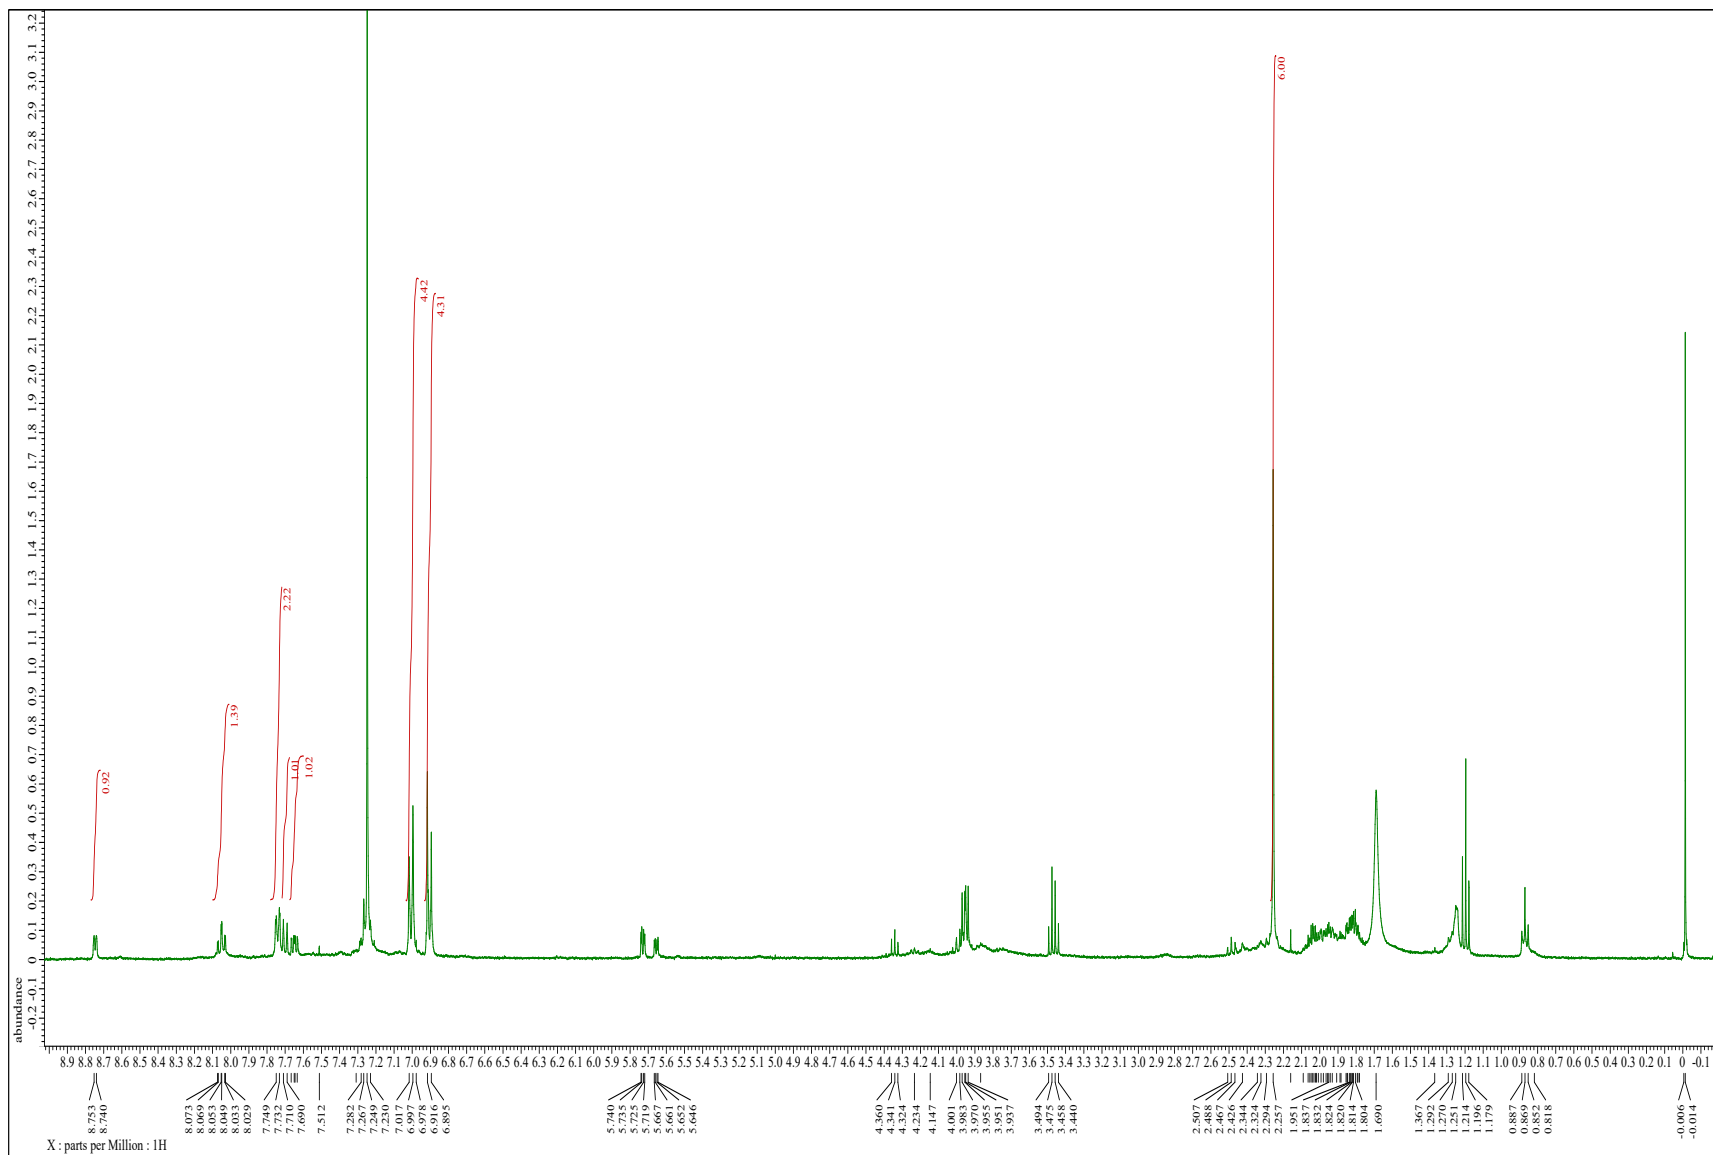



# Zinc-thiazole complex **8b**

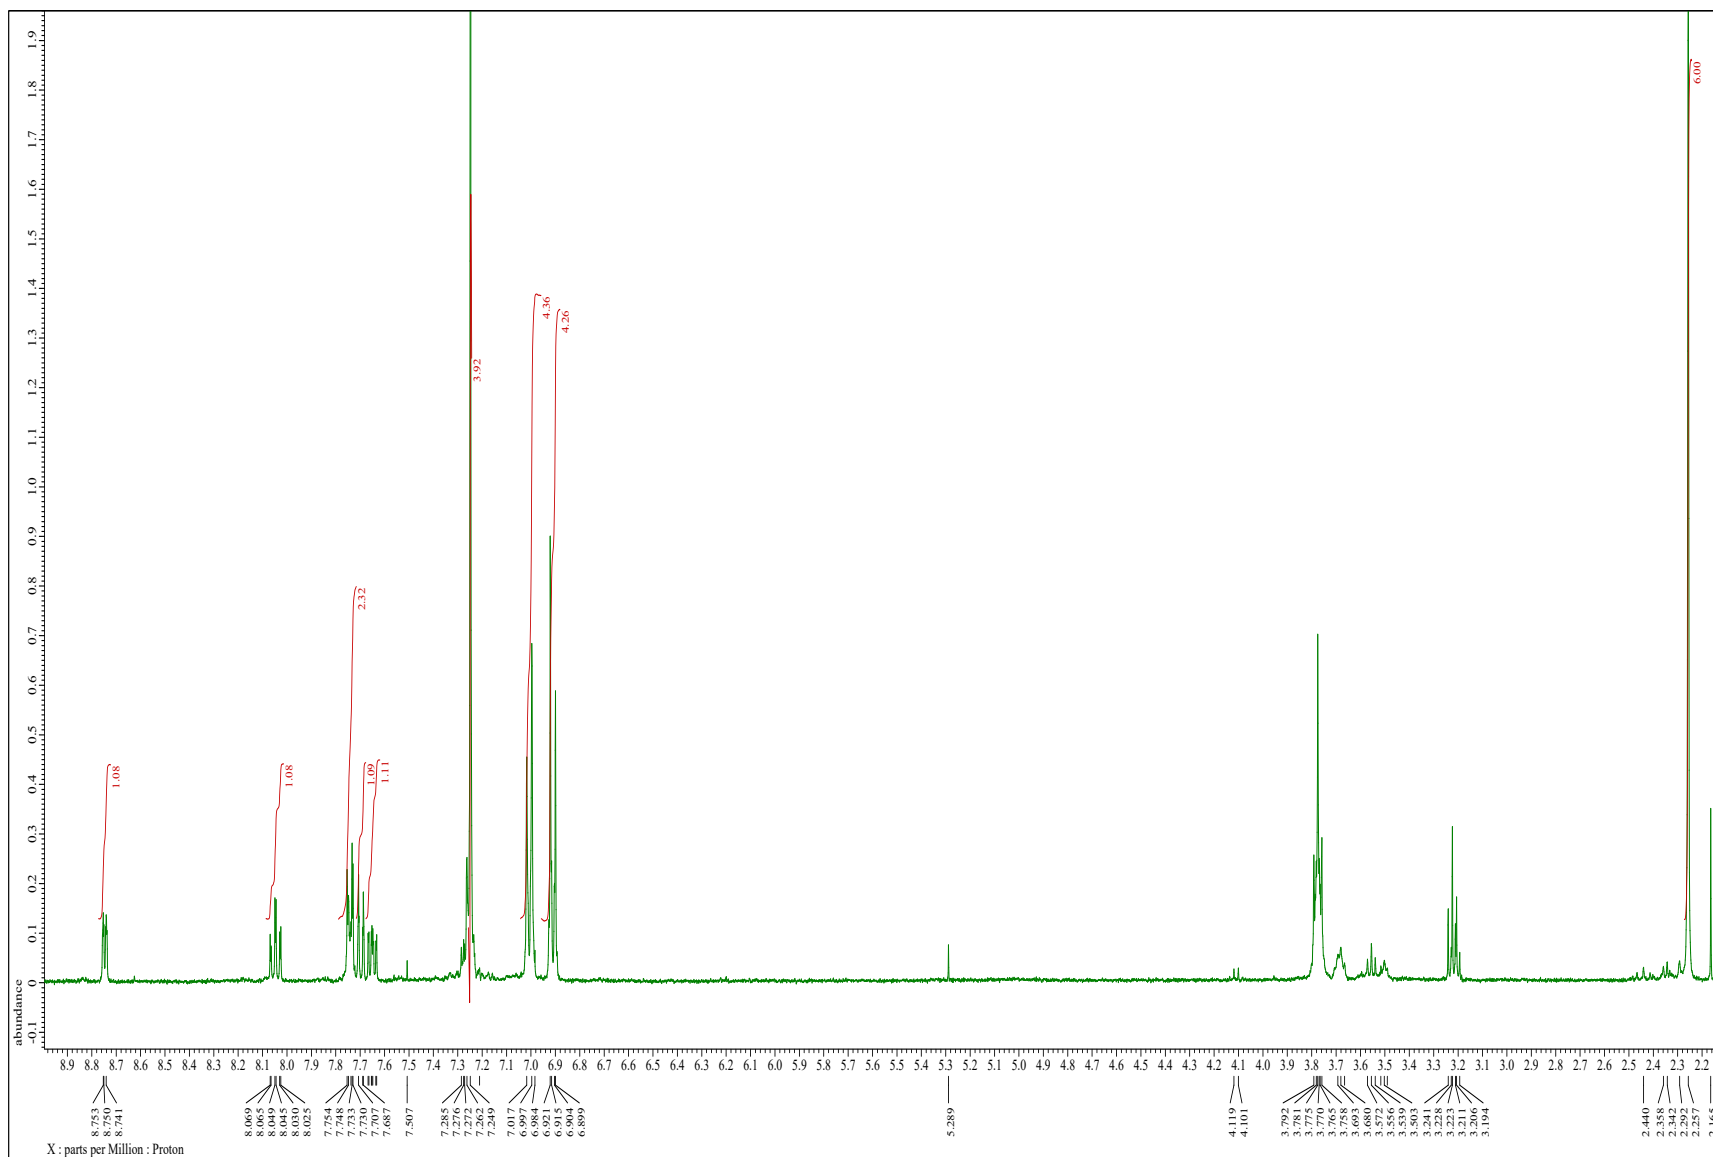

# Zinc-thiazole complex **8c**

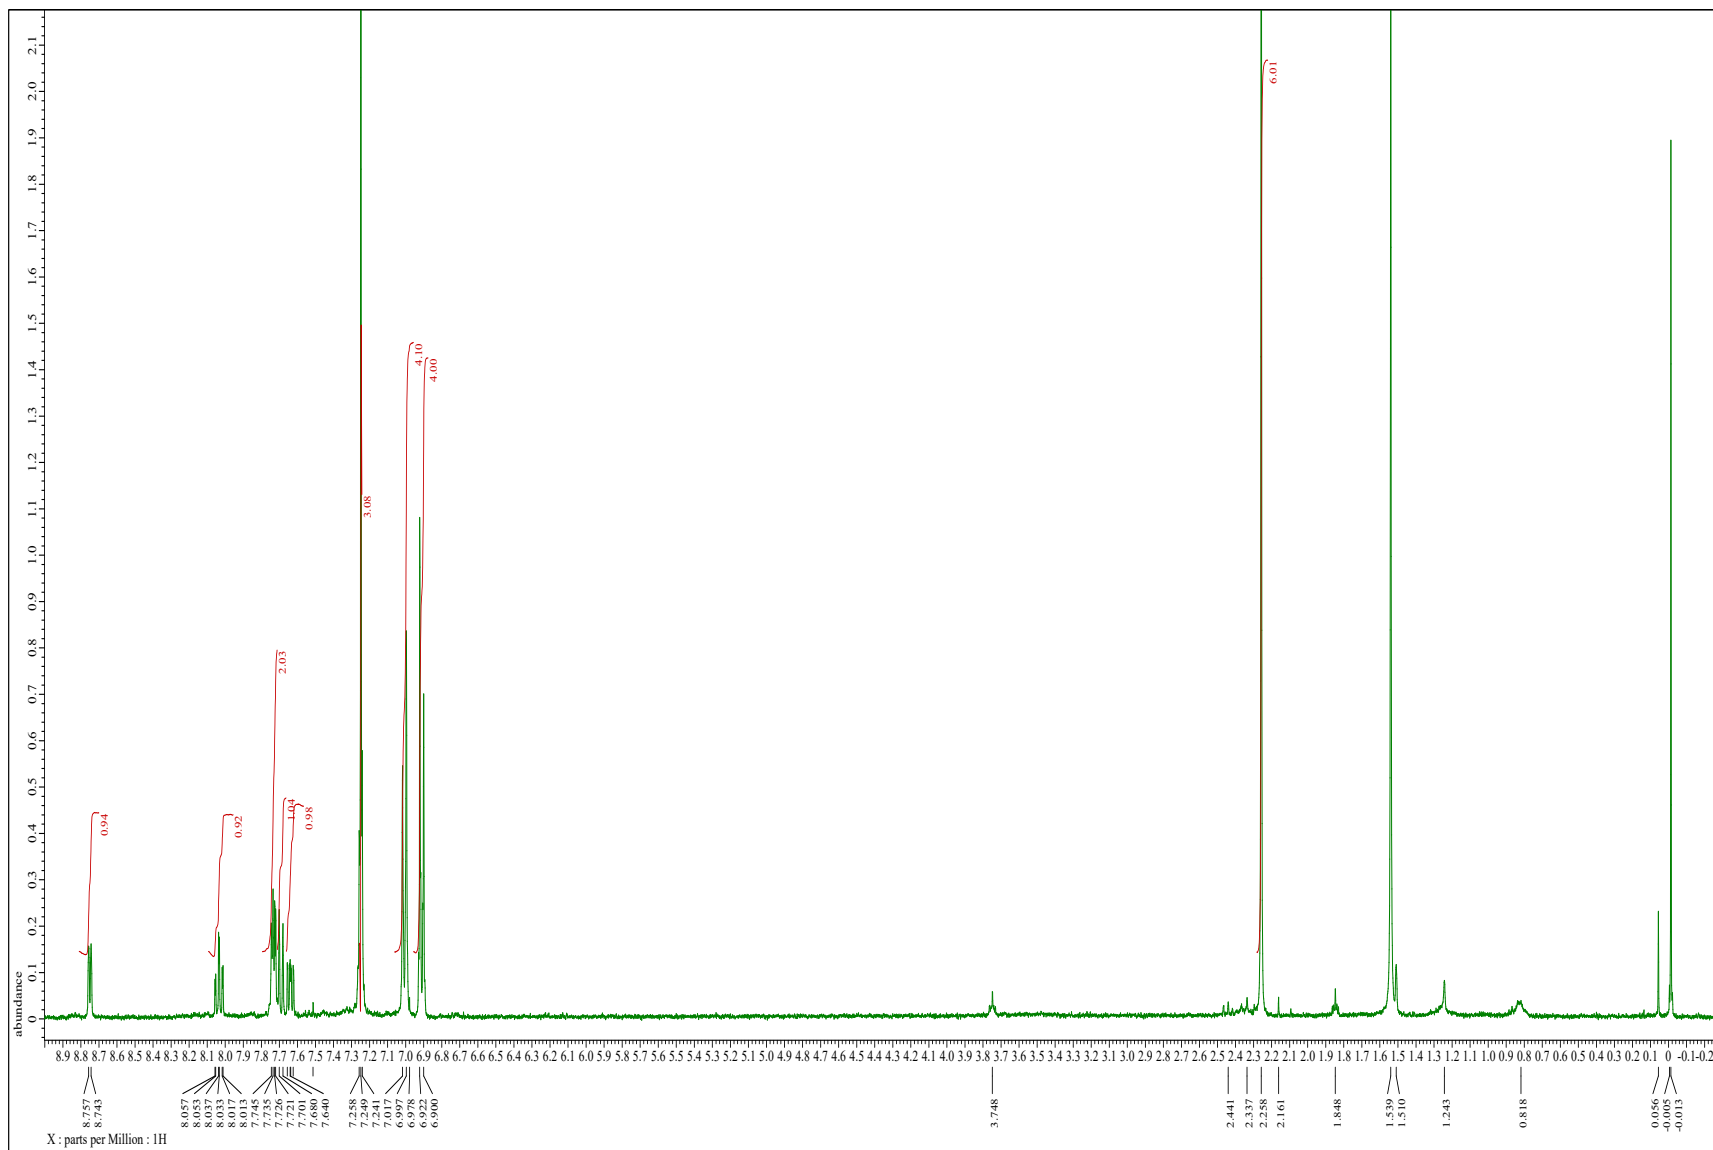

**<sup>13</sup>C NMR charts for 5-*N*-arylaminothiazoles and zinc-thiazole complexes.**

**5-aminothiazole **4a****

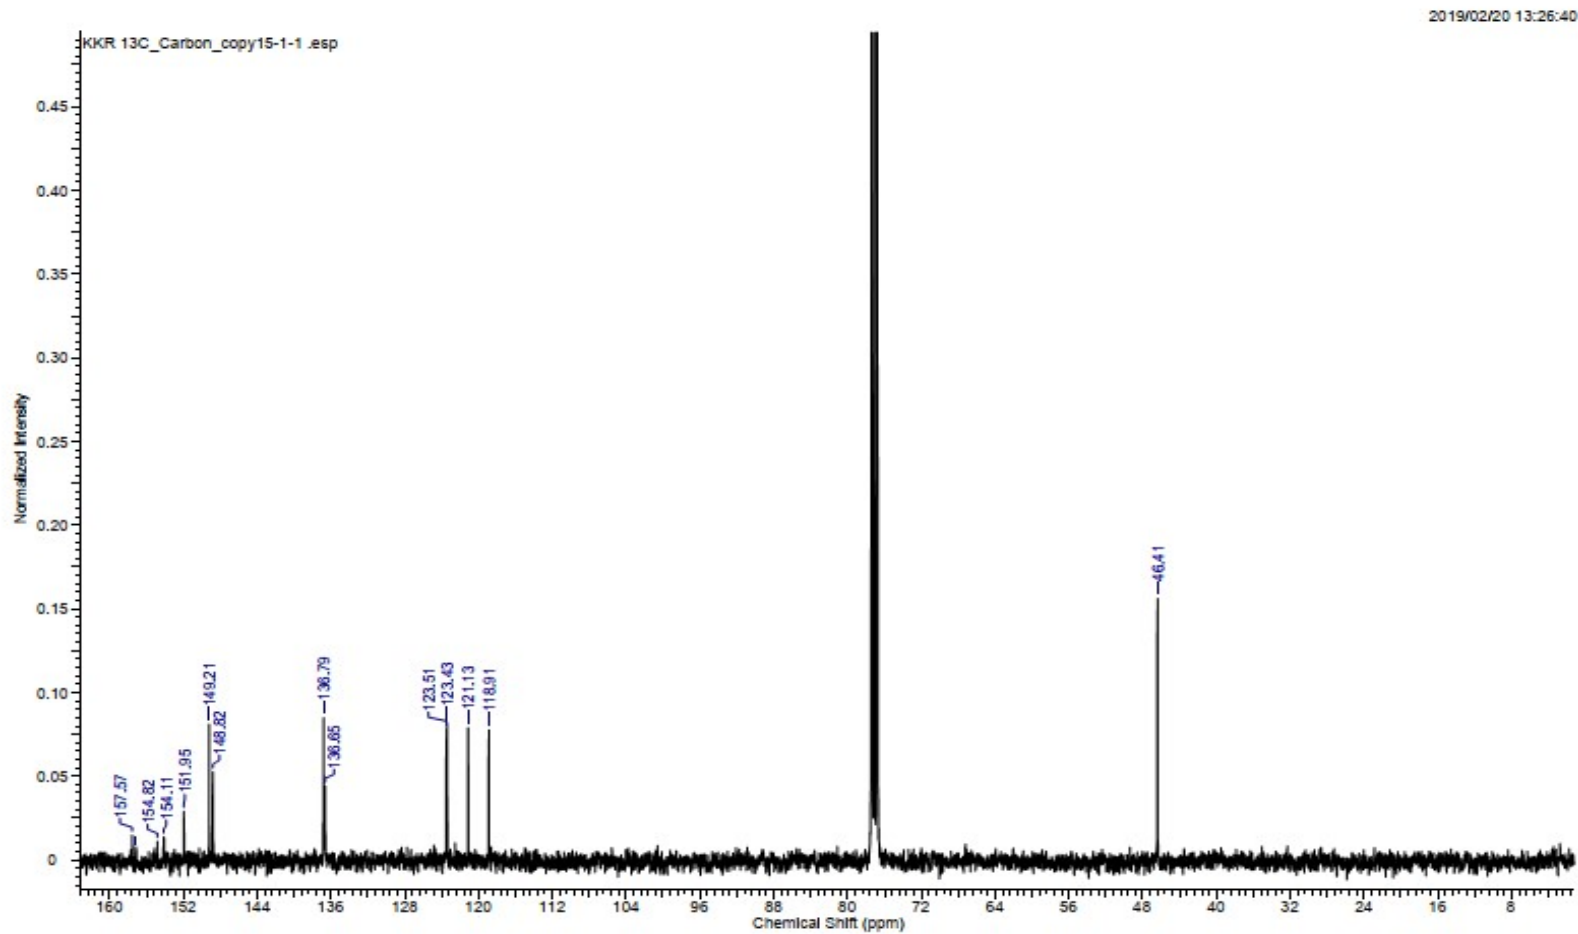

# 5-aminothiazole **4b**

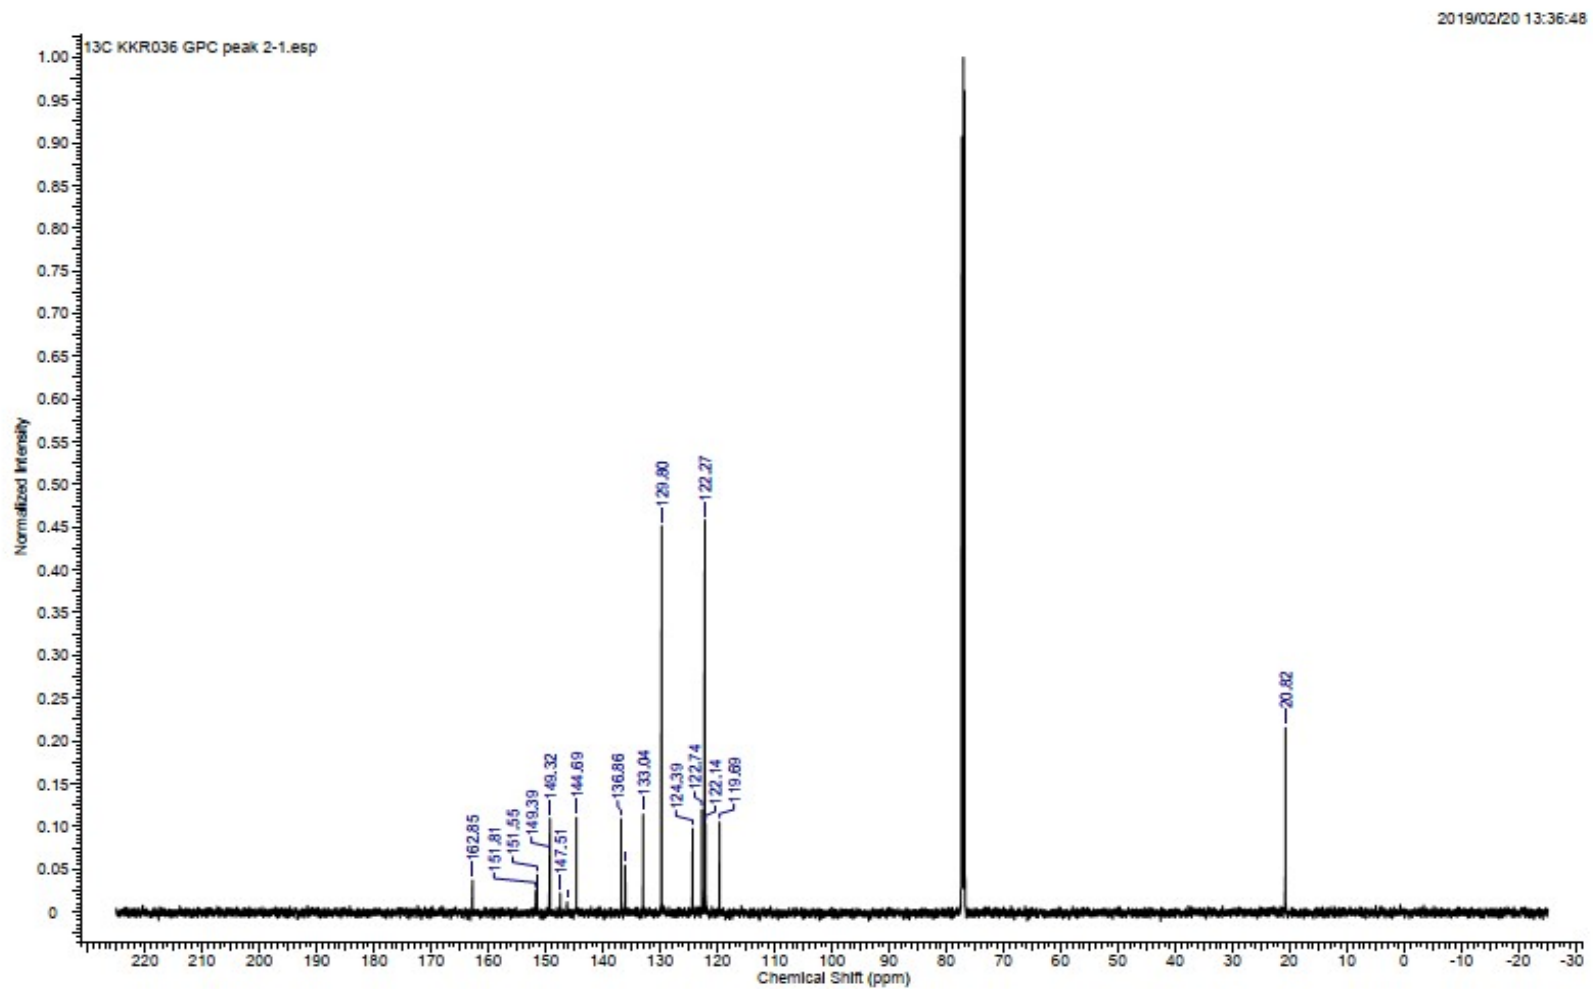

# 5-aminothiazole 4c

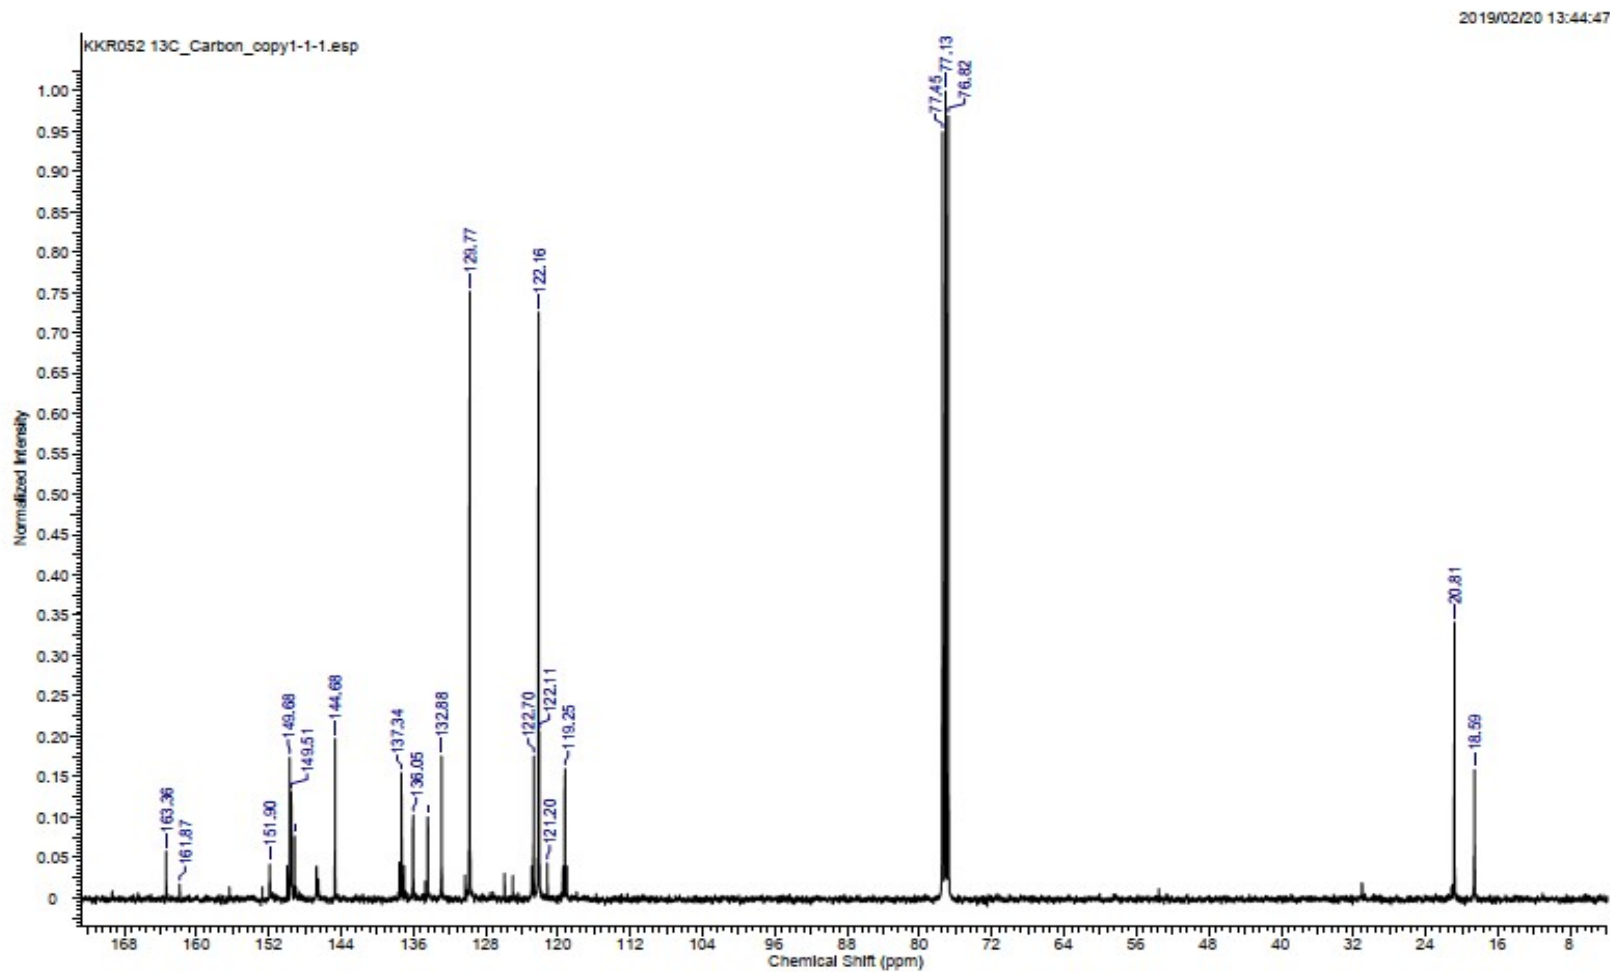

5-aminothiazole **4d**

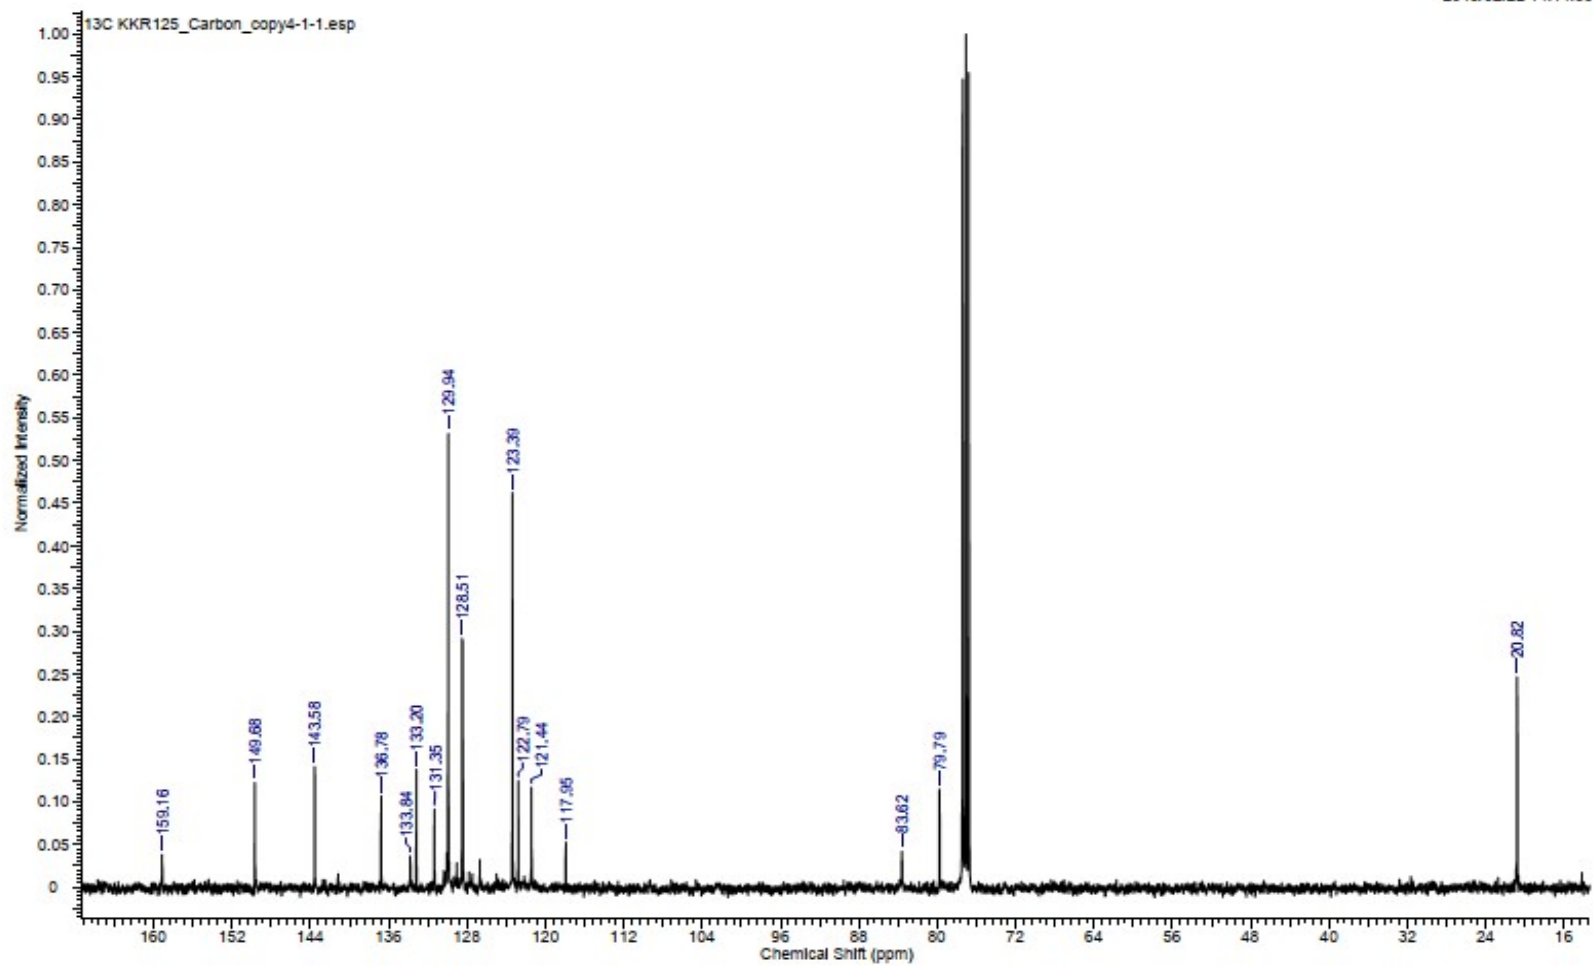5-aminothiazole **4e**

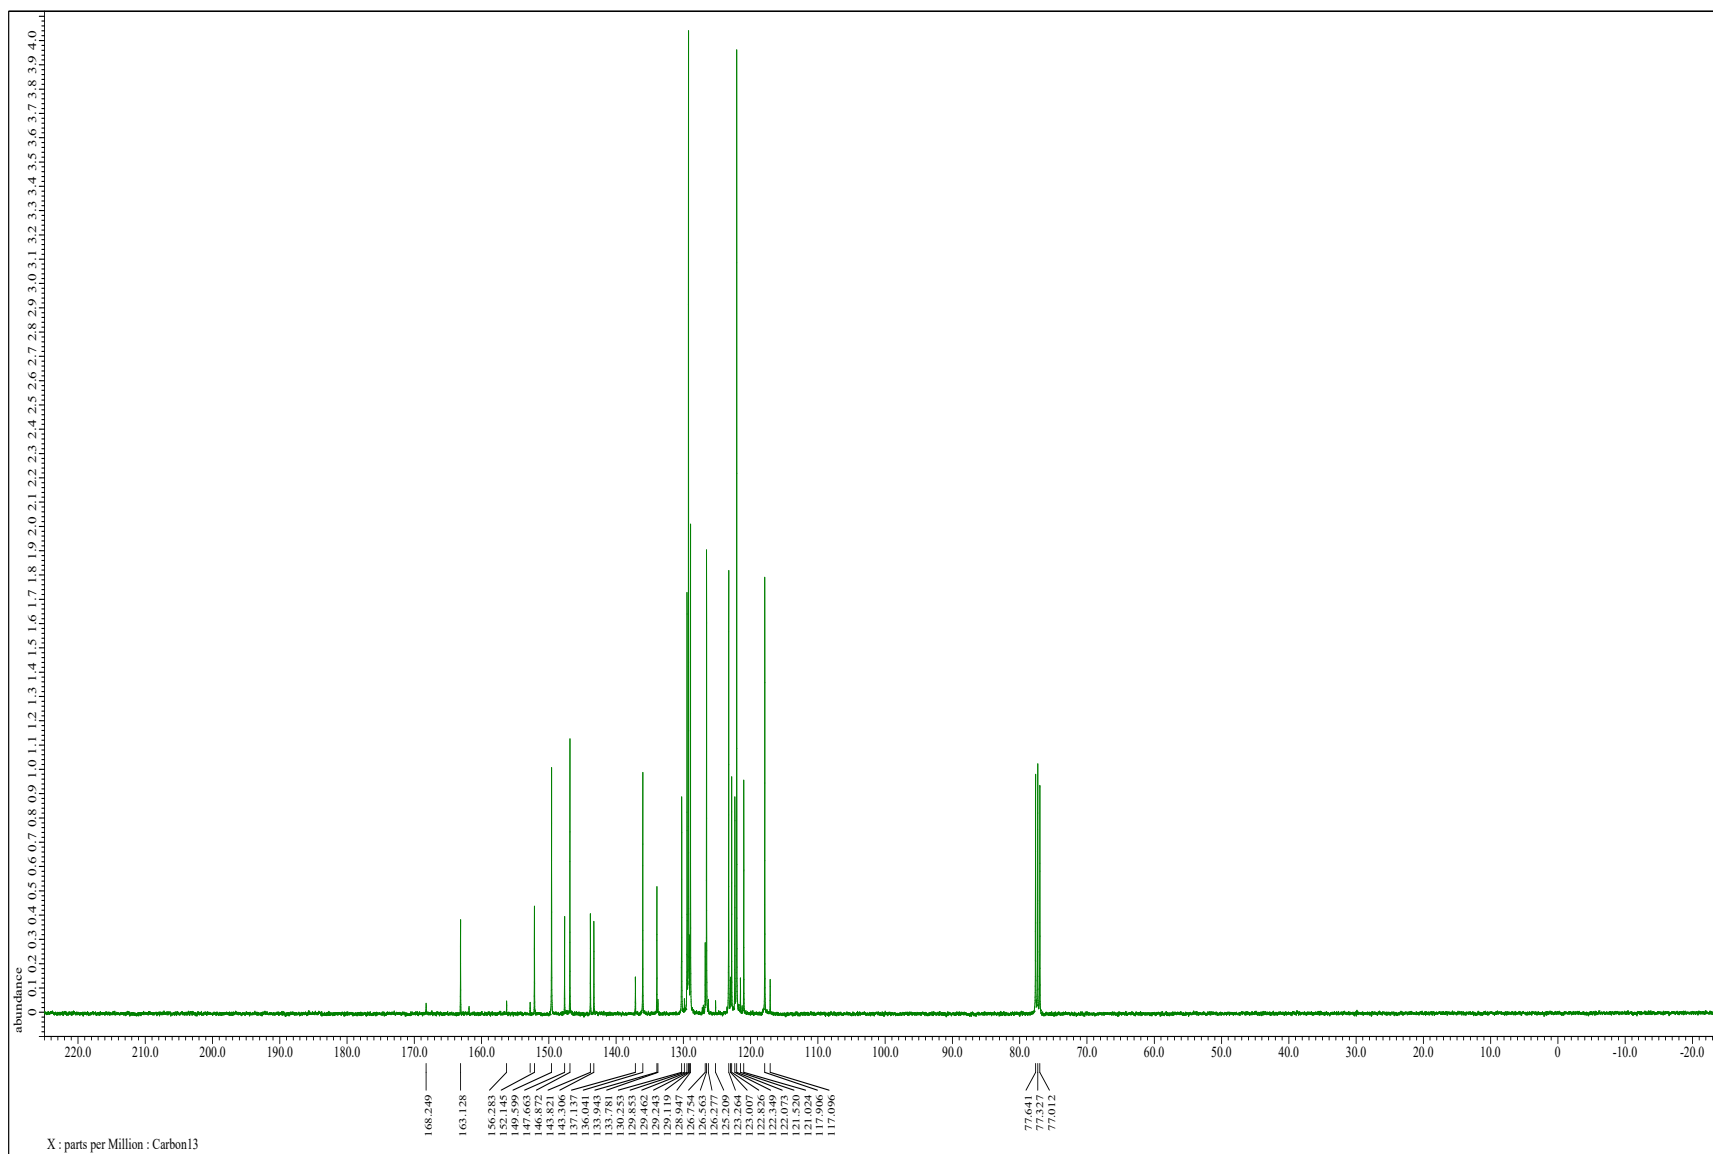

5-aminothiazole **4f**



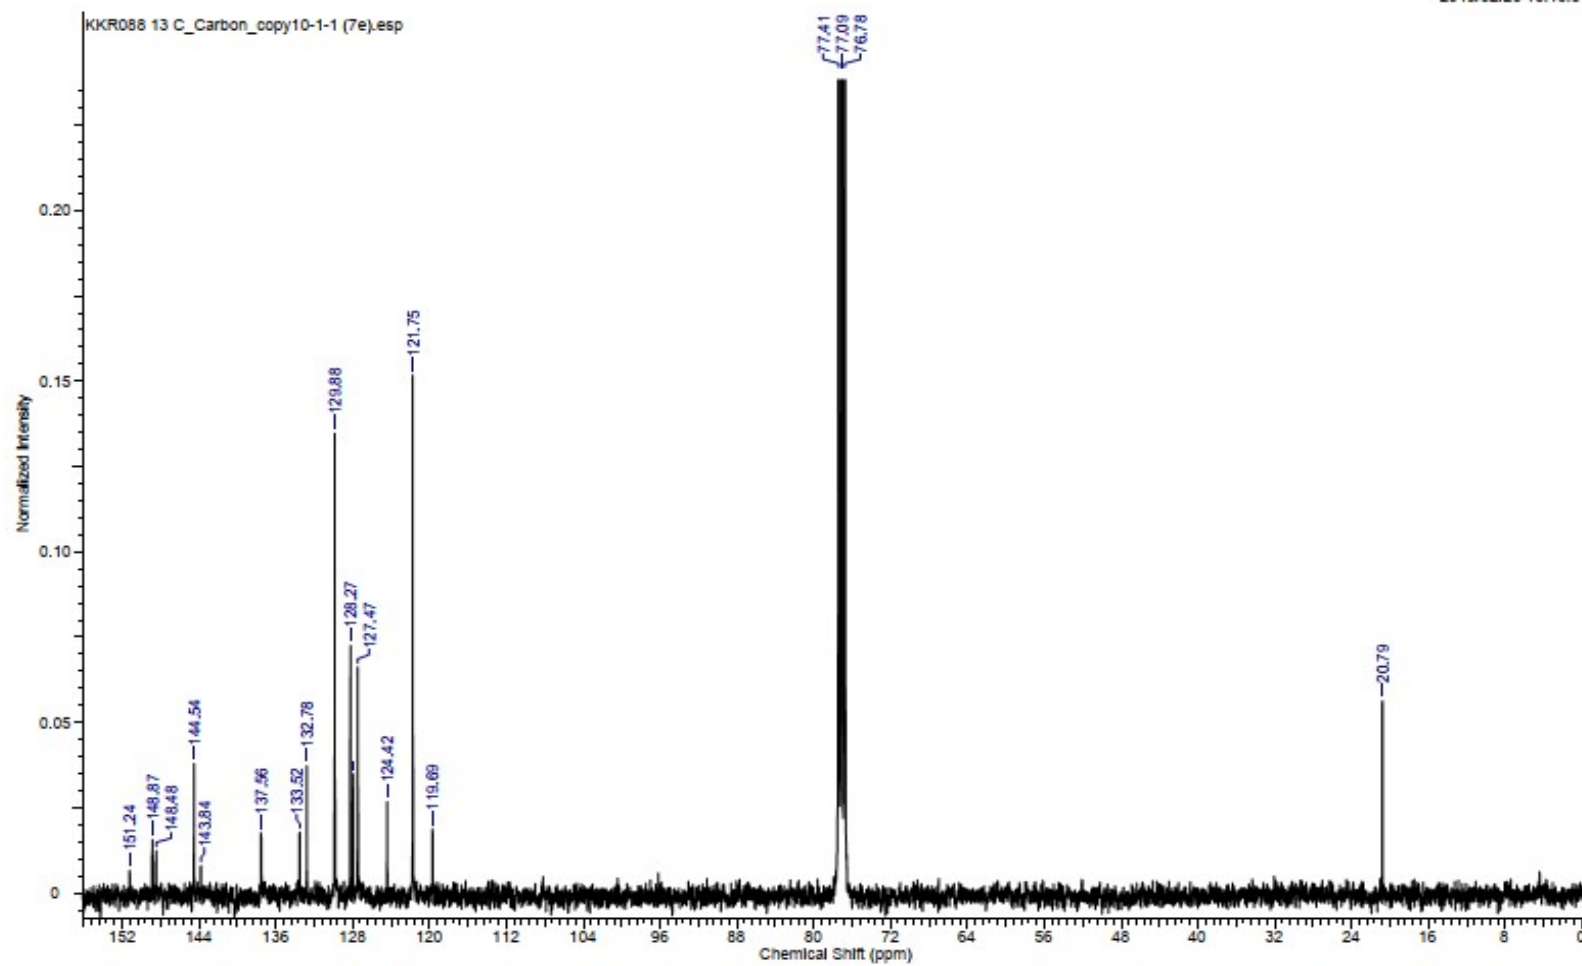Dipyrromethene type ligand **6a**

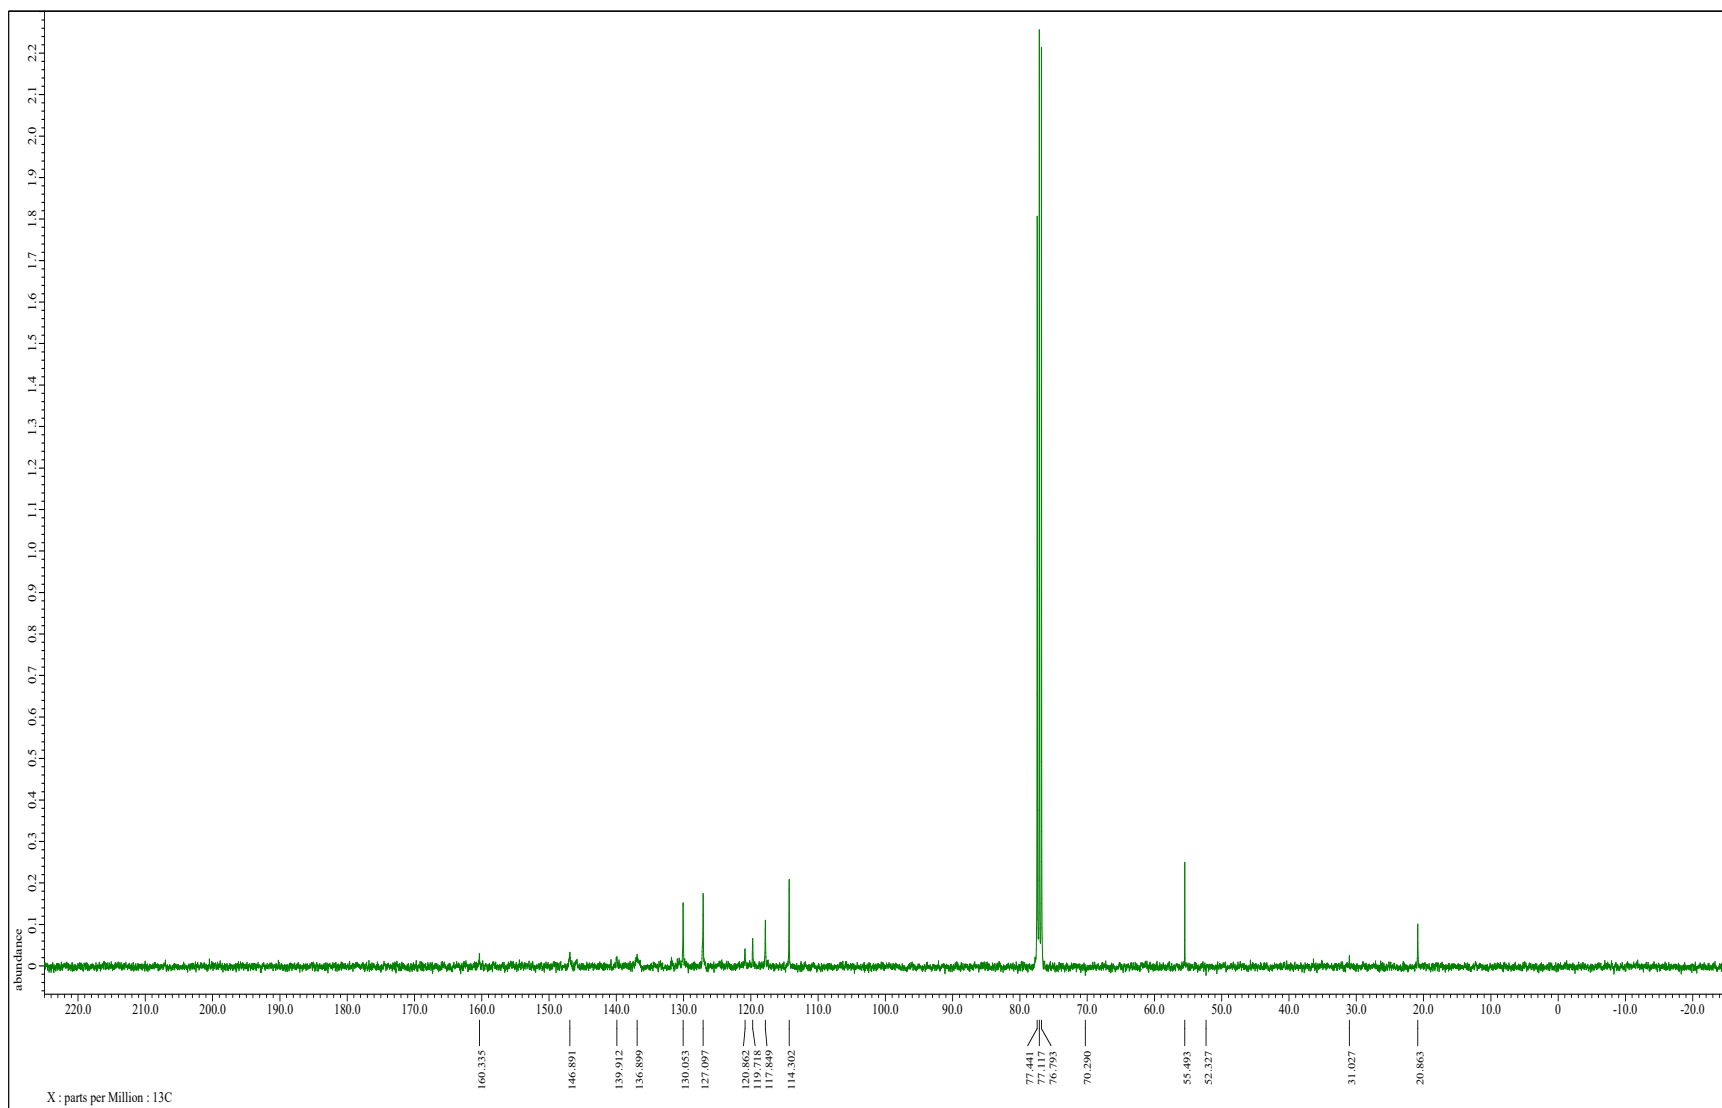

# Dipyrromethene type ligand **6b**

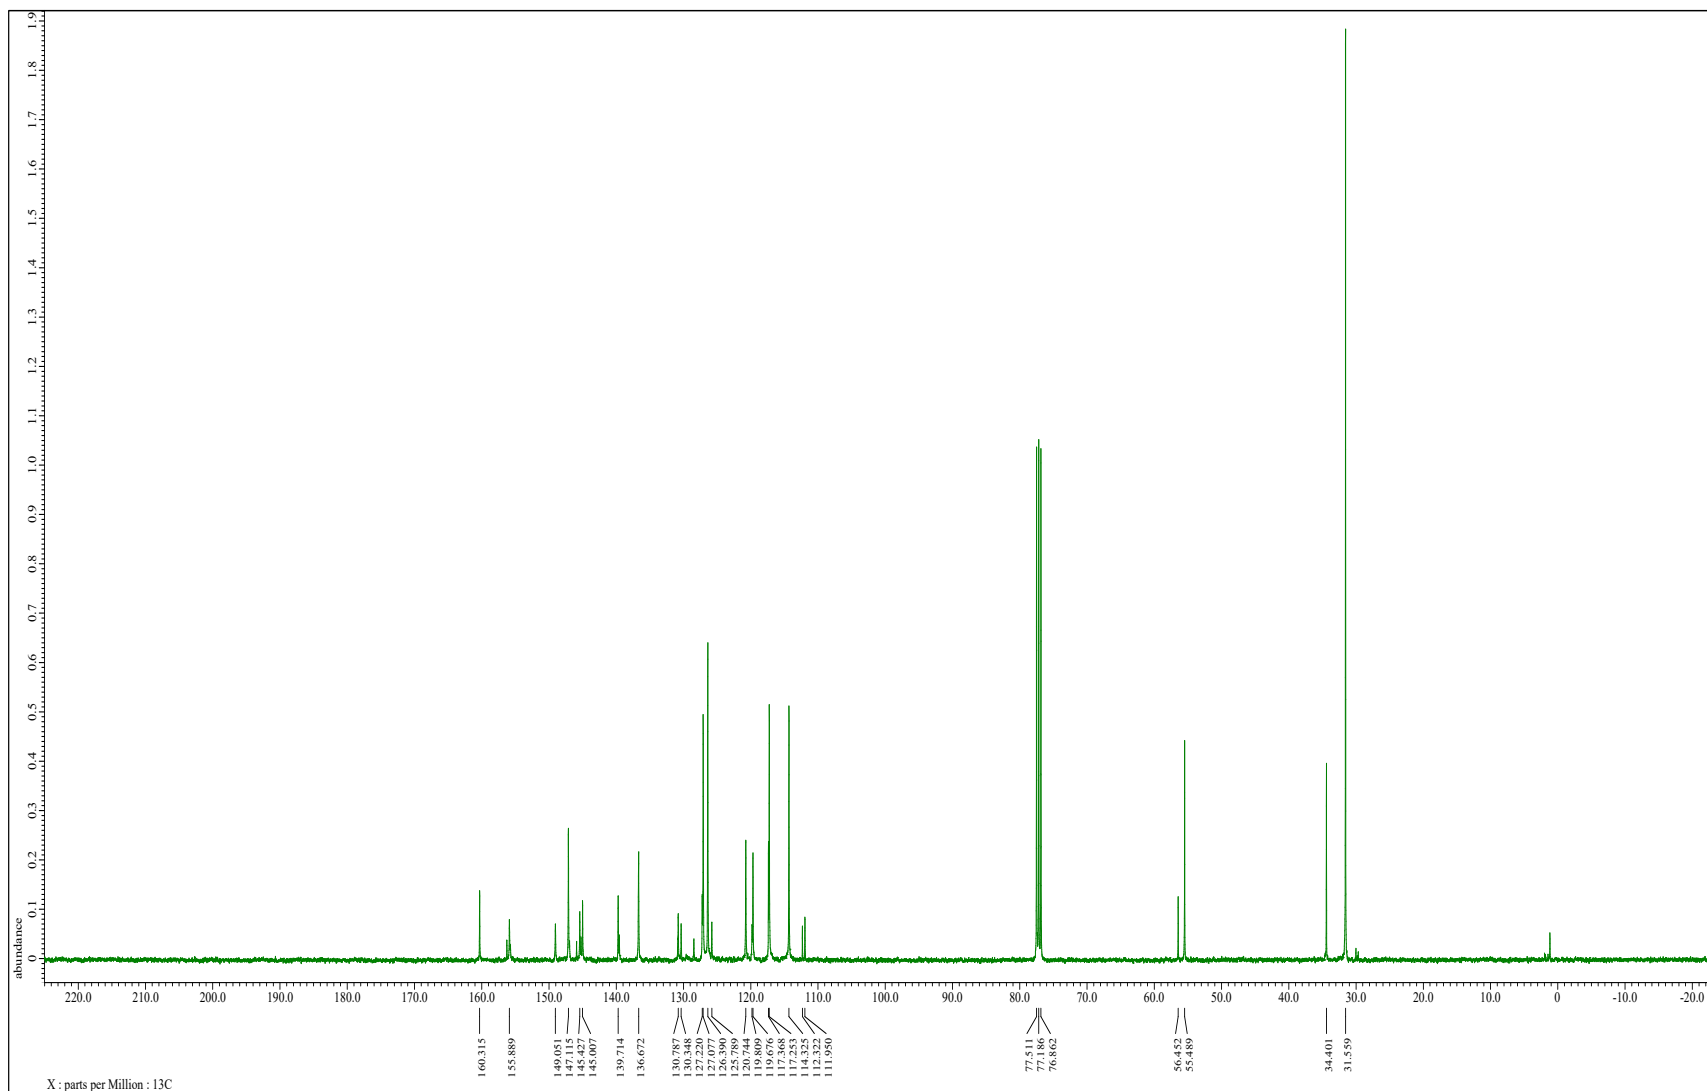

# Zinc-thiazole complex 8a

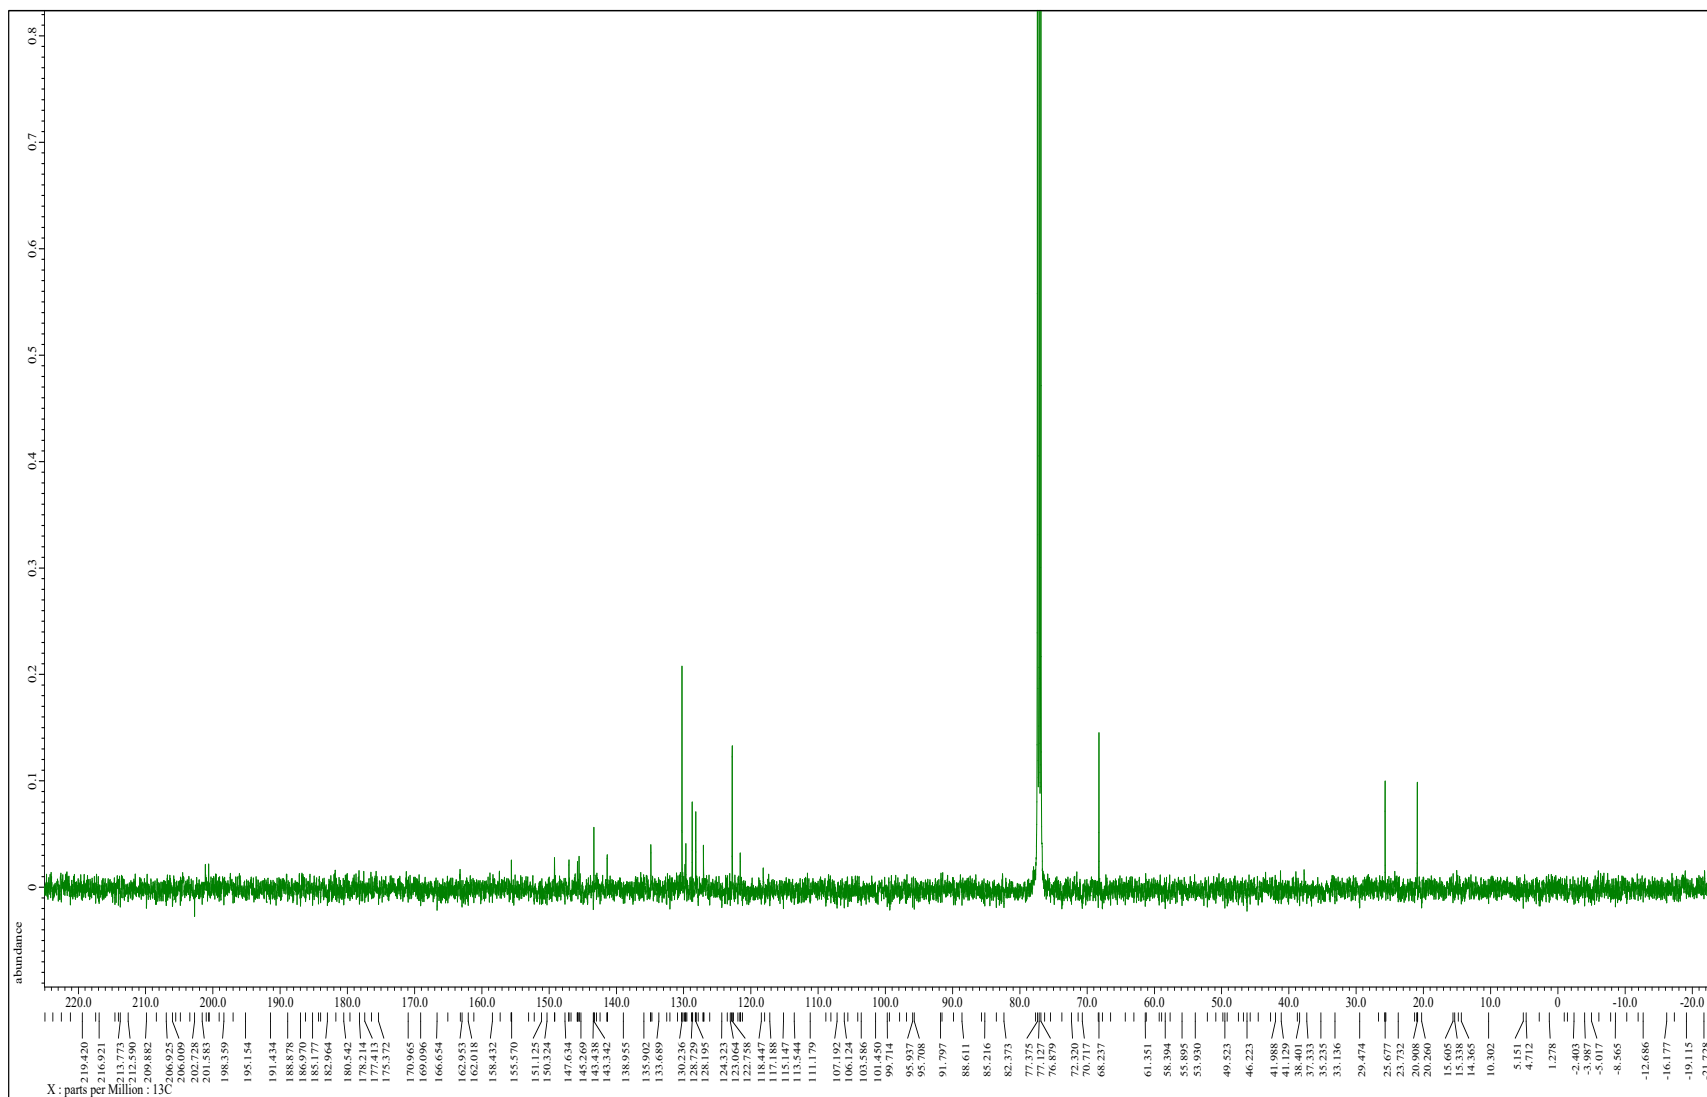

# Zinc-thiazole complex **8b**

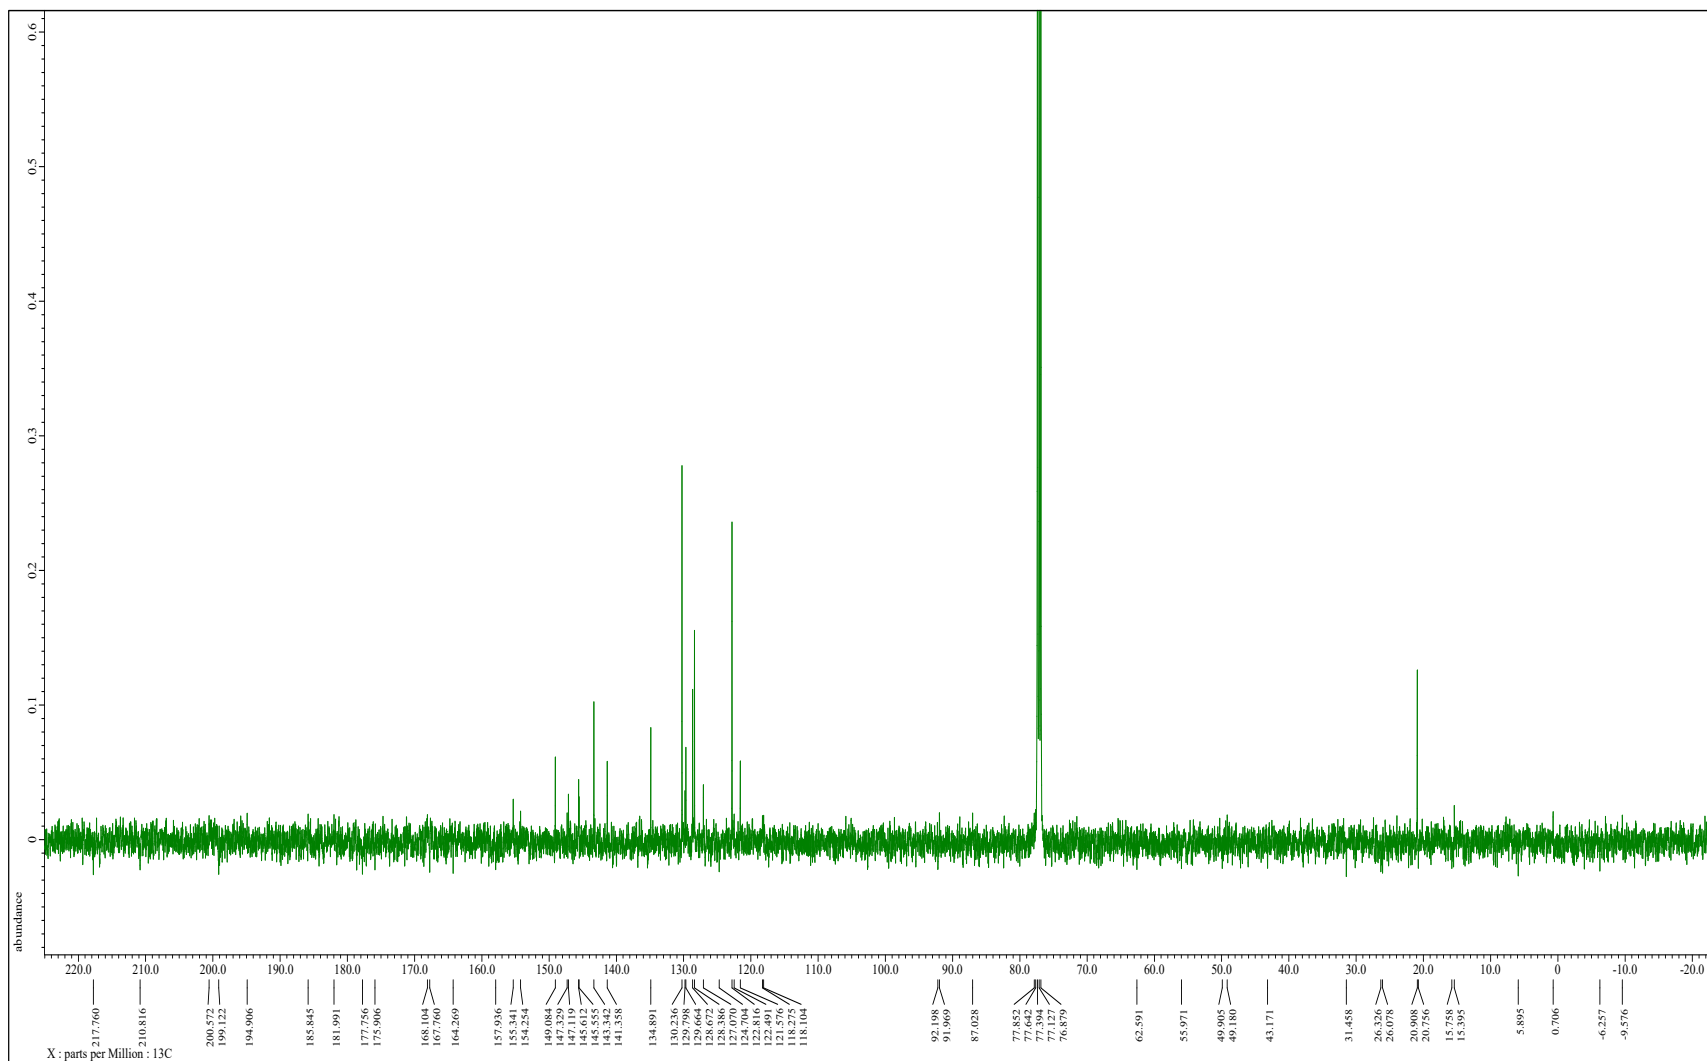

# Zinc-thiazole complex **8c**

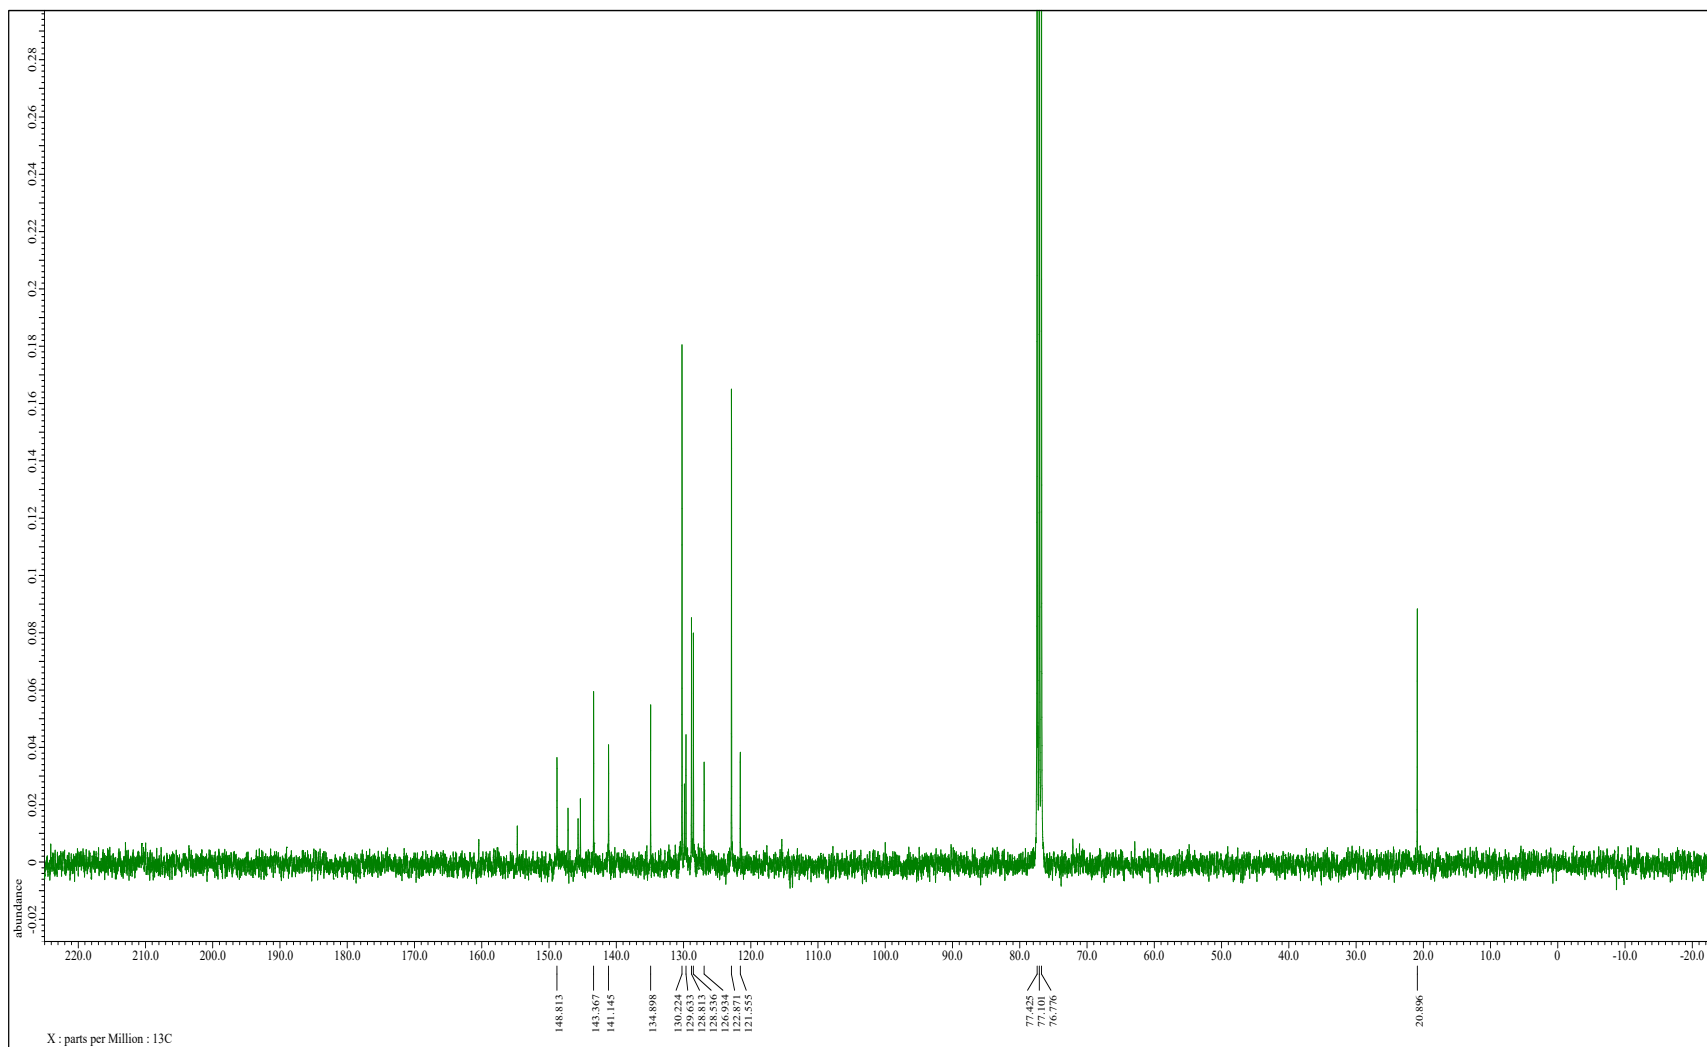

Supplement: d2ra01694j1.pdf [file d2ra01694j1.pdf]
